# Supplementary material for: Synthesis, Molecular Docking, In Vitro and In Vivo Studies of Novel Dimorpholinoquinazoline-Based Potential Inhibitors of PI3K/Akt/mTOR Pathway
Source: MDPI journal article supplement (doi:10.3390/ijms231810854), 2022-09-17
Supplement: s1 [file s1]

## Supporting information for

### Synthesis, molecular docking, *in vitro* and *in vivo* studies of novel dimorpholinoquinazoline-based potential inhibitors of PI3K/Akt/mTOR pathway

Maria V. Zapevalova<sup>a</sup>, Ekaterina S. Shchegravina<sup>\*a,b</sup>, Irina P. Fonareva<sup>a</sup>, Diana I. Salnikova<sup>c</sup>, Danila V. Sorokin<sup>c</sup>, Alexander M. Scherbakov<sup>c</sup>, Alexander A. Maleev<sup>a</sup>, Stanislav K. Ignatov<sup>a</sup>, Ivan D. Grishin<sup>a</sup>, Alexander N. Kuimov<sup>d</sup>, Maryia V. Konovalova<sup>e</sup>, Elena V. Svirshchevskaya<sup>e</sup> and Alexey Yu. Fedorov<sup>\*a,b</sup>

<sup>a</sup> Department of Organic Chemistry, Nizhny Novgorod State University, Gagarina av. 23, Nizhny Novgorod 603950, Russian Federation.

<sup>b</sup> N.D. Zelinsky Institute of Organic Chemistry RAS, Leninsky Prospekt 47, Moscow 119991, Russian Federation.

<sup>c</sup> Department of Experimental Tumor Biology, Blokhin N.N. National Medical Research Center of Oncology, Kashirskoye sh. 24, Moscow 115522, Russian Federation.

<sup>d</sup> A.N. Belozersky Institute of Physico-Chemical Biology, M.V.Lomonosov Moscow State University, Leninskiye gory, house 1, building 40, 119992 Moscow, Russian Federation

<sup>e</sup> Department of Immunology, Shemyakin-Ovchinnikov Institute of Bioorganic Chemistry RAS, Miklukho-Maklaya 16/10, Moscow 117997, Russian Federation

\* Corresponding authors: [sc.katarina@yandex.ru](mailto:sc.katarina@yandex.ru) (E.S.S.), [afedorovNN@yandex.ru](mailto:afedorovNN@yandex.ru) (A.Yu.F.)

## Table of contents

|                                                  |          |
|--------------------------------------------------|----------|
| NMR spectra of compounds 2-6; 7a-l .....         | .....S3  |
| Predicted ADME features of target compounds..... | .....S22 |
| Illustrations for docking studies .....          | .....S23 |
| Figure S1.....                                   | .....S25 |
| HPLC chromatogram for <b>7c</b> .....            | .....S26 |

# NMR spectra for compounds 2-6, 7a-l

## 2-amino-4-bromobenzoic acid 2

PROTON\_01  
mz8

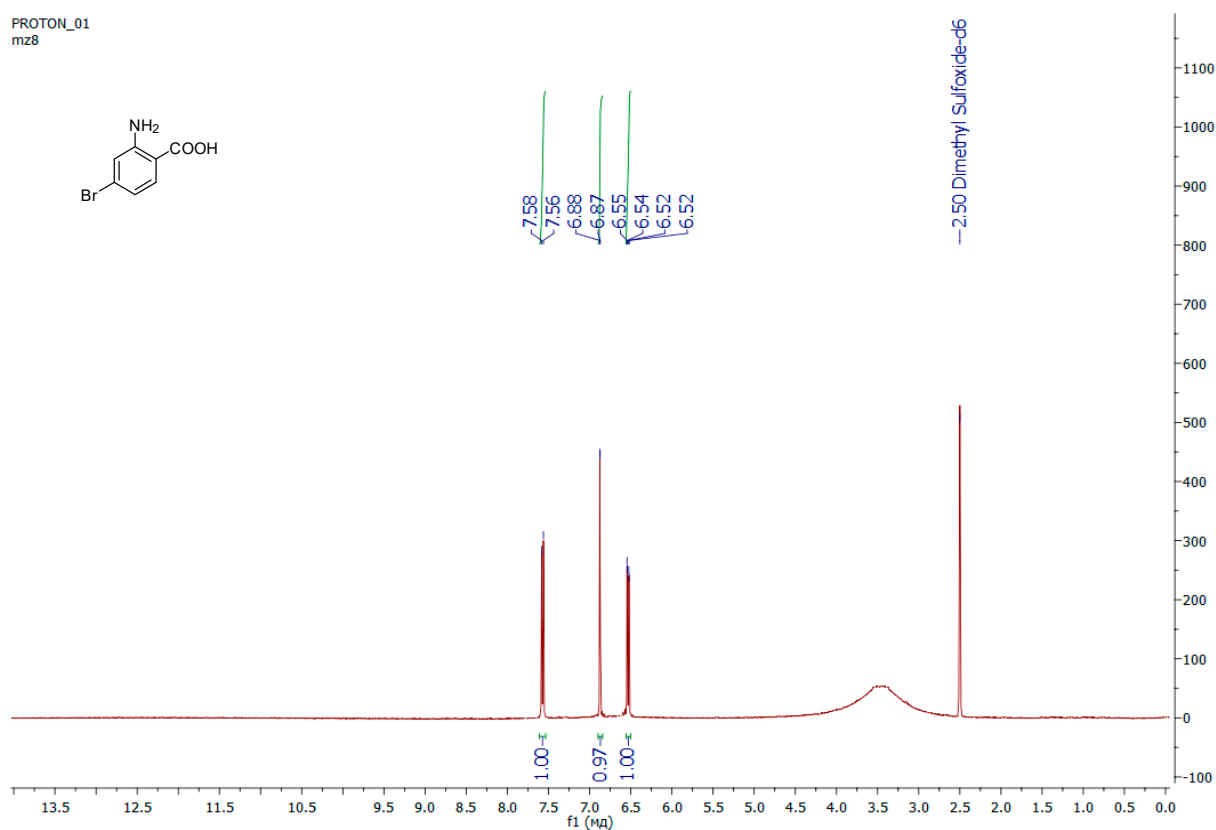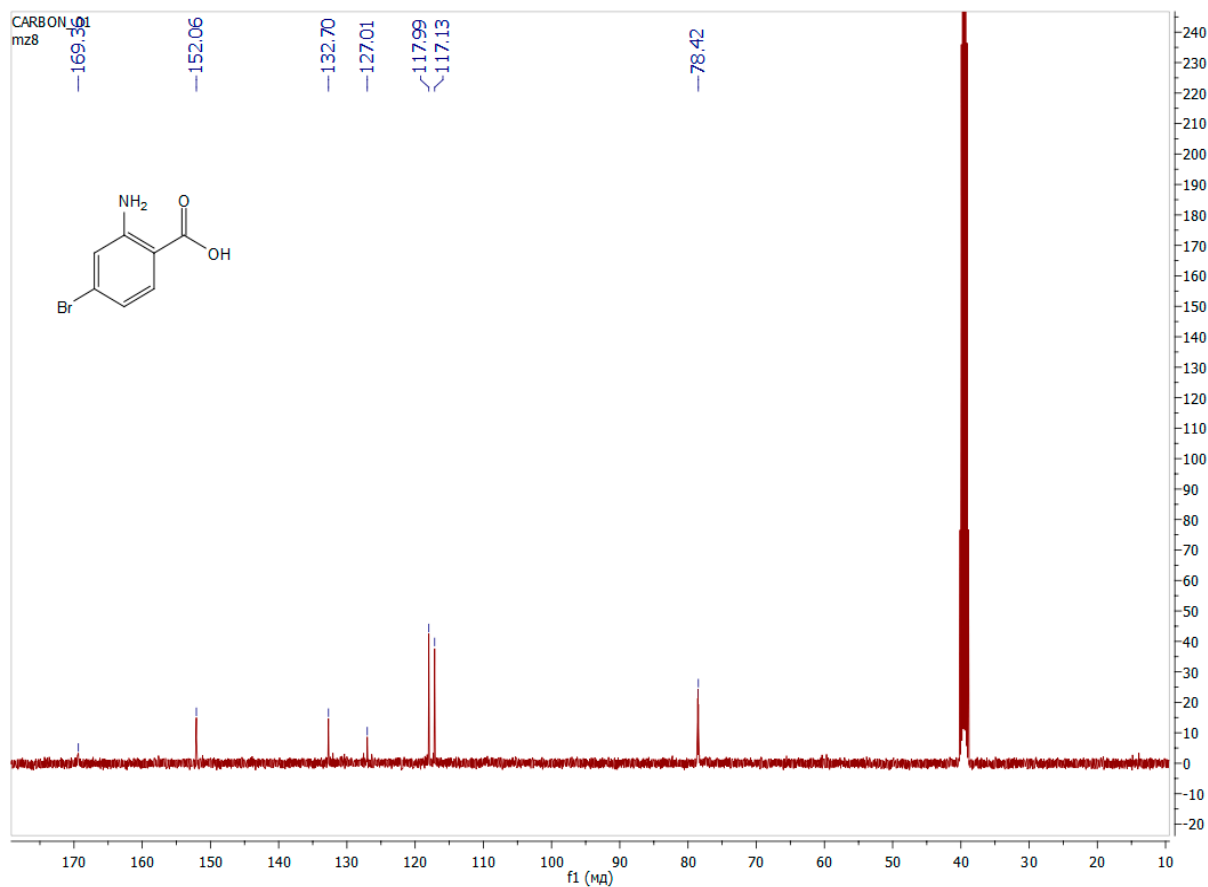

# 7-bromoquinazoline-2,4(1H,3H)-dione **3**

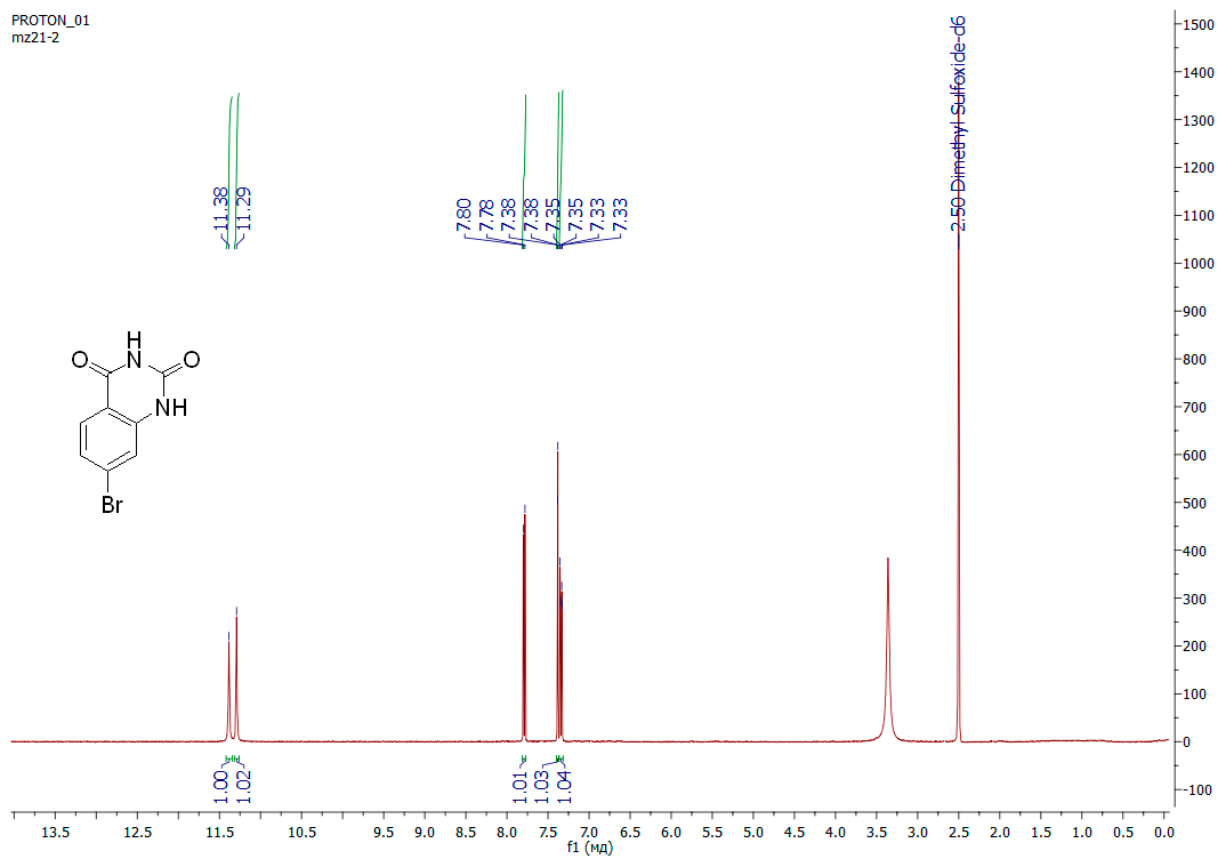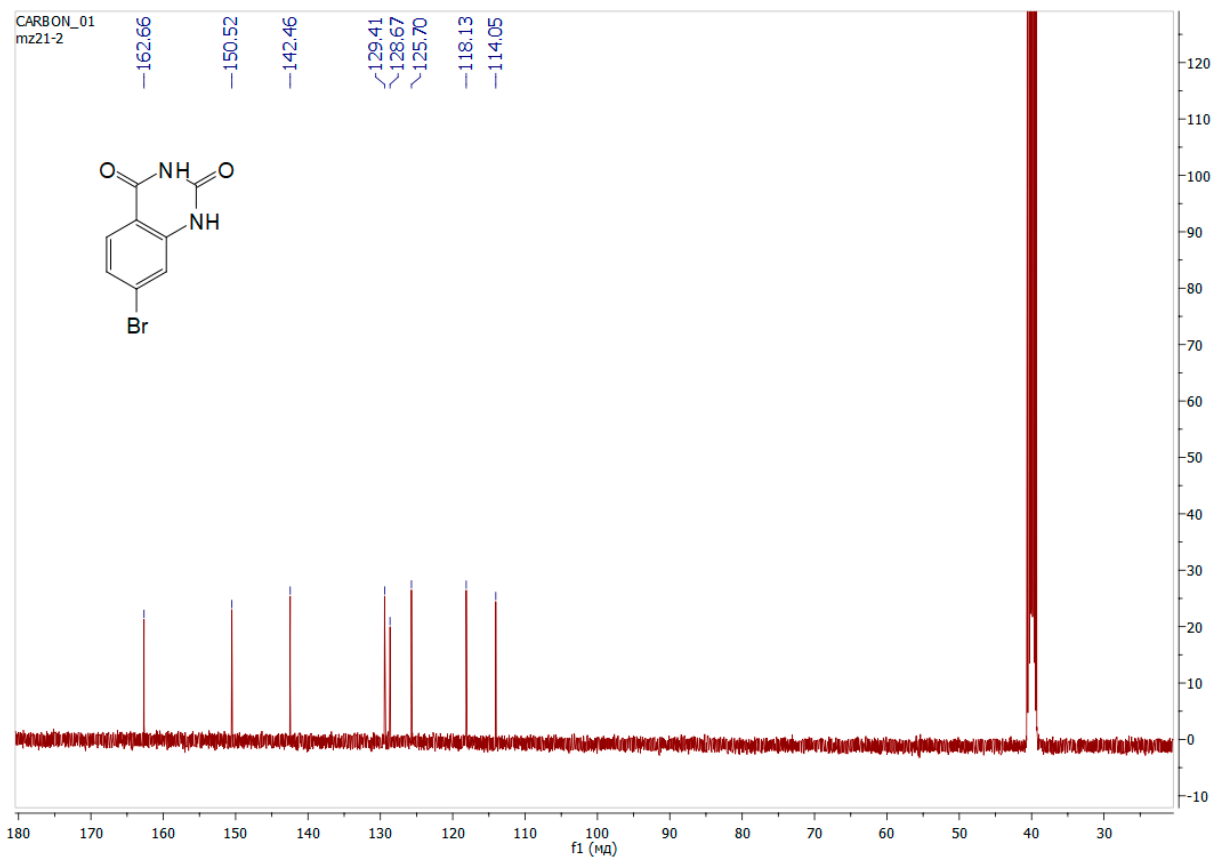

# 7-bromo-2,4-dichloroquinazoline

4

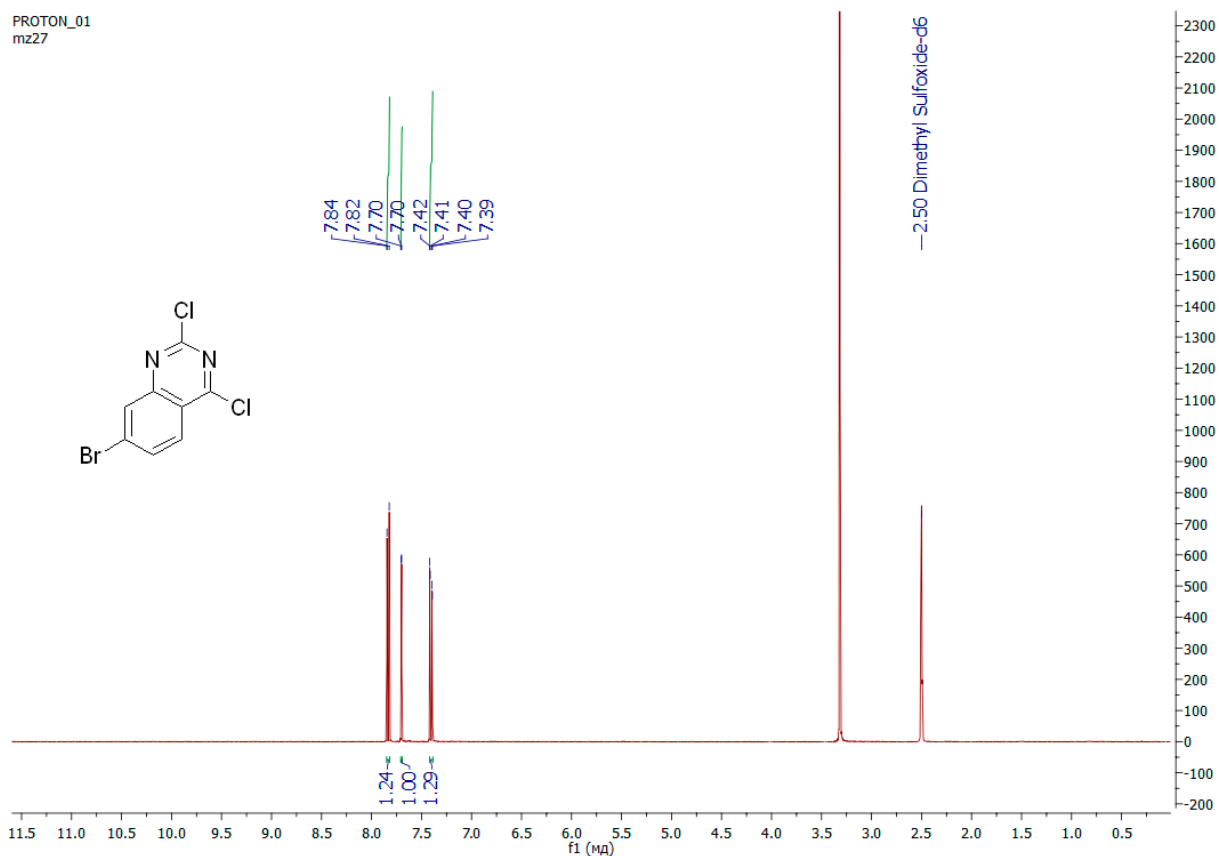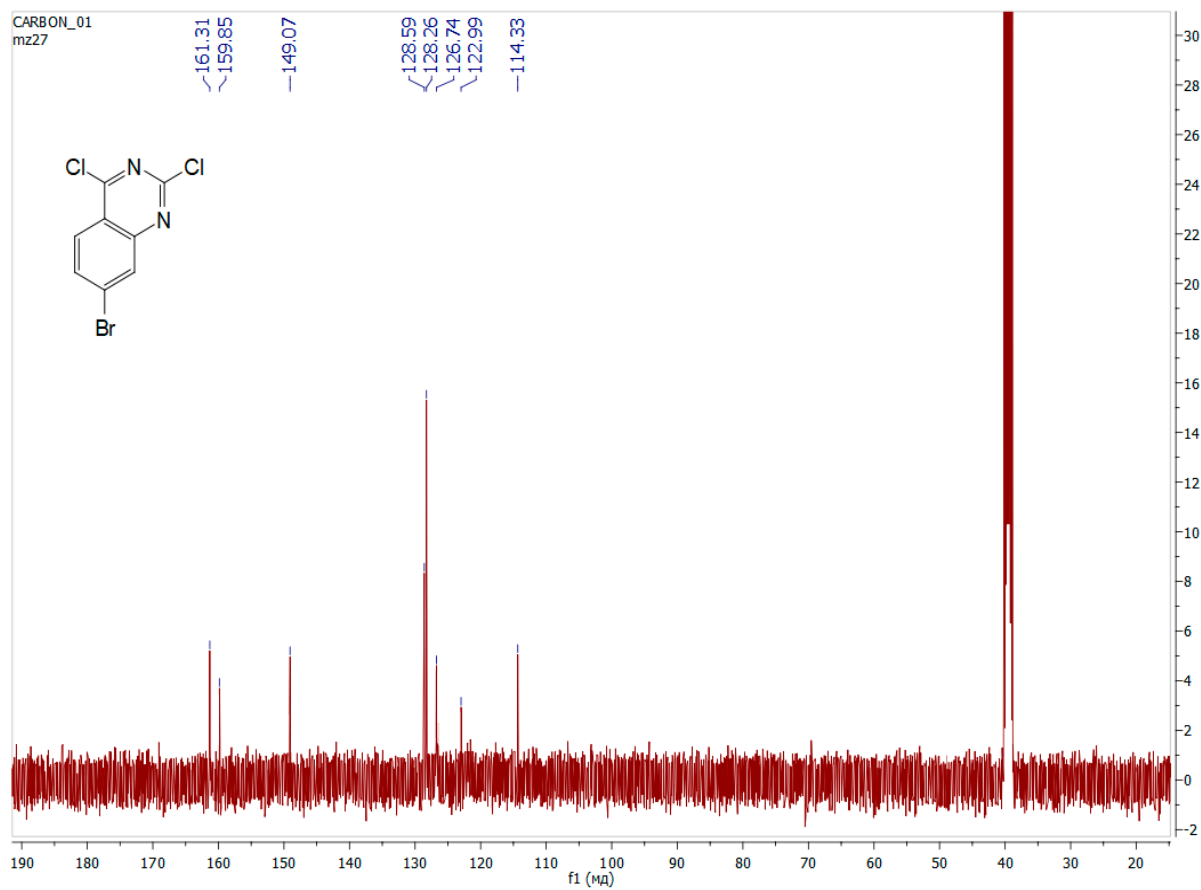

4,4'-(7-bromoquinazoline-2,4-diyl)dimorpholine

5

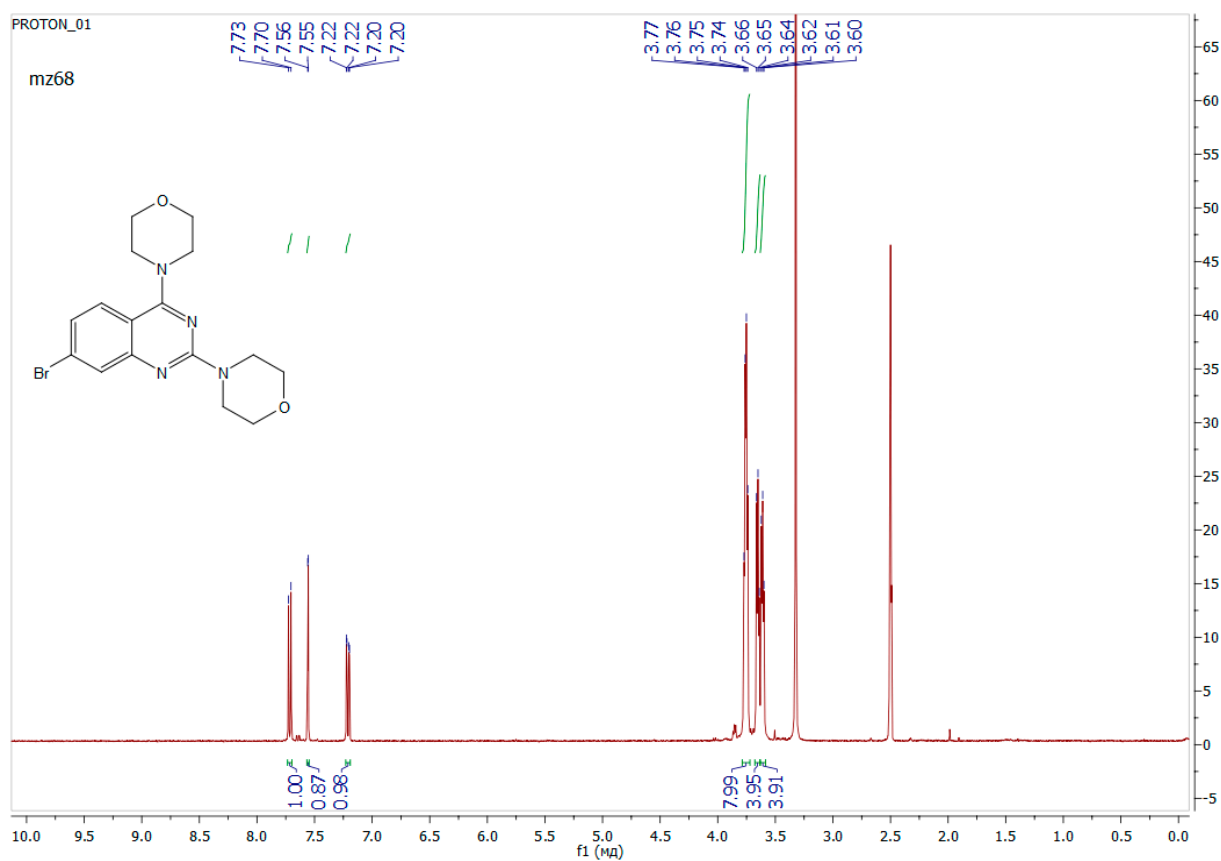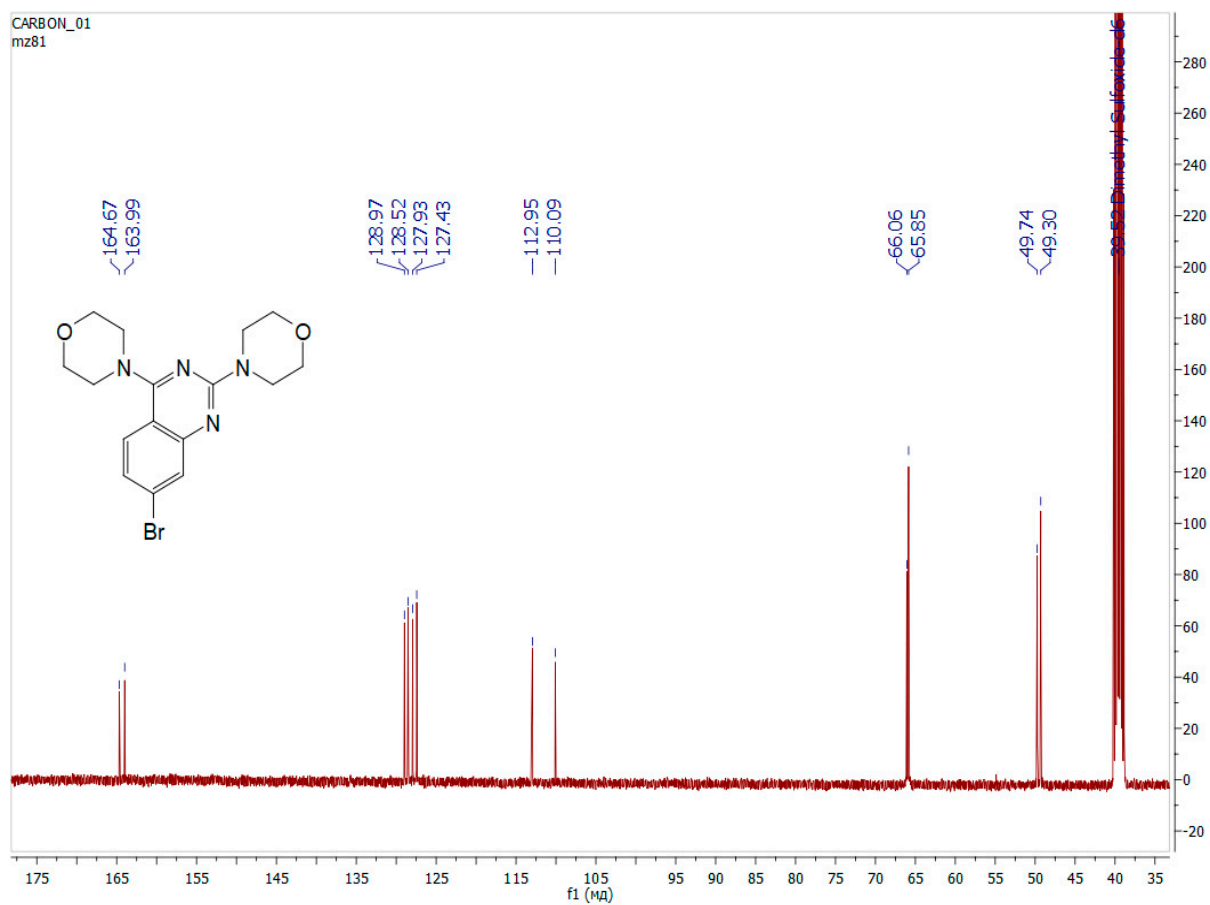

*tert*-butyl (4-(2,4-dimorpholinoquinazolin-7-yl)phenyl)carbamate

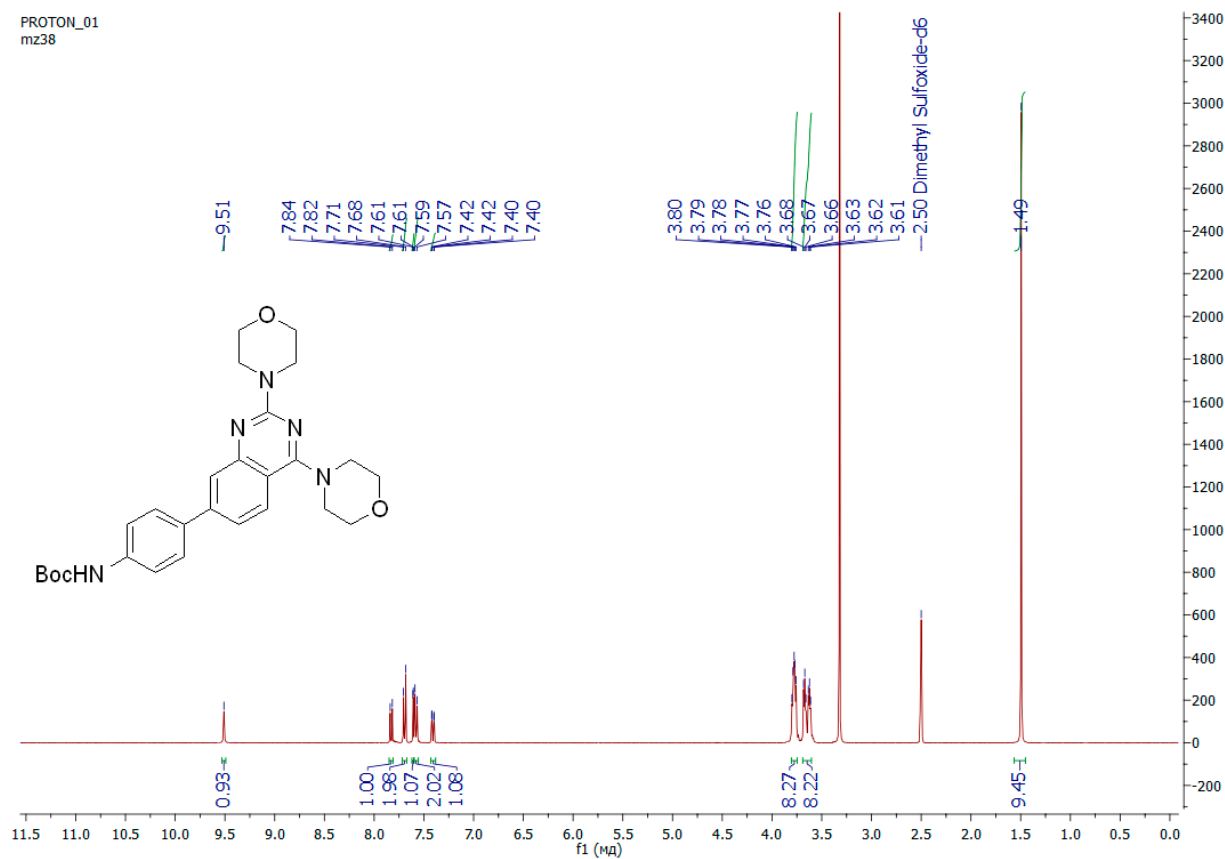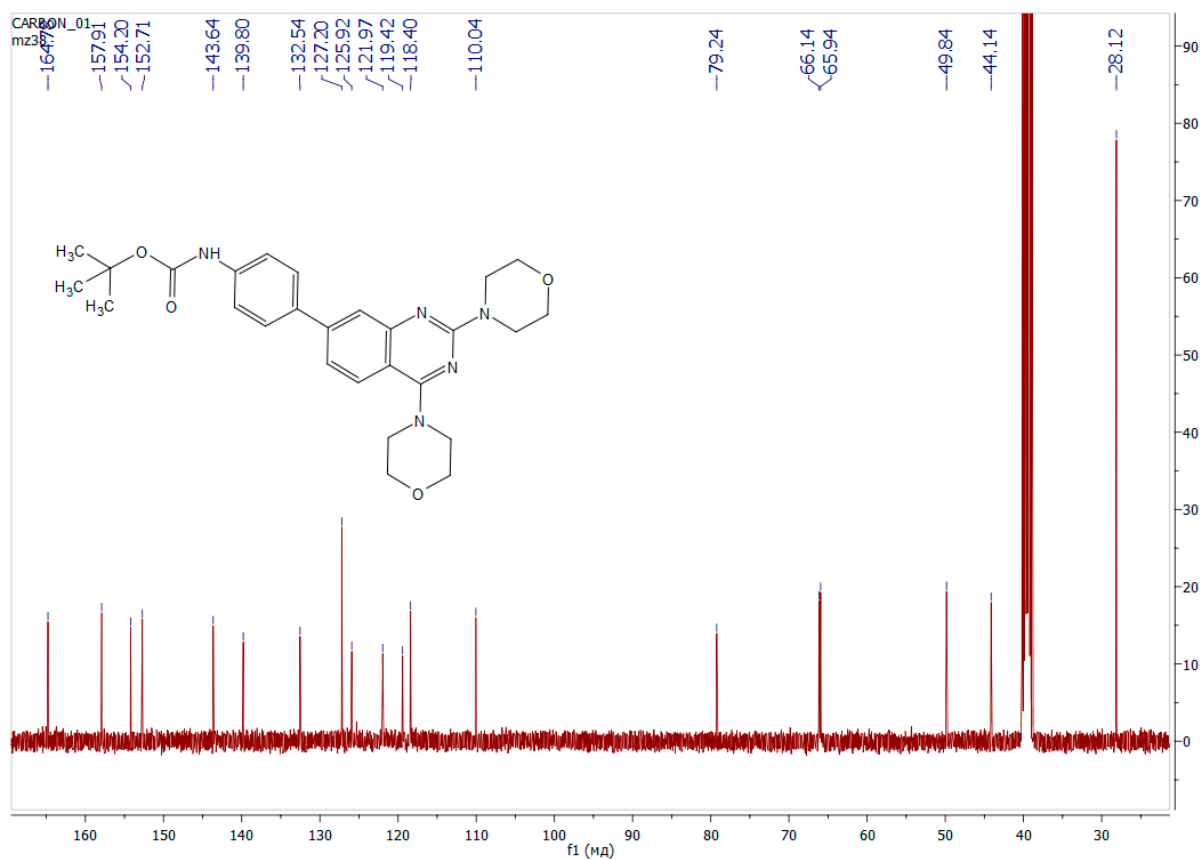

# 4-(2,4-dimorpholinoquinazolin-7-yl)aniline

6

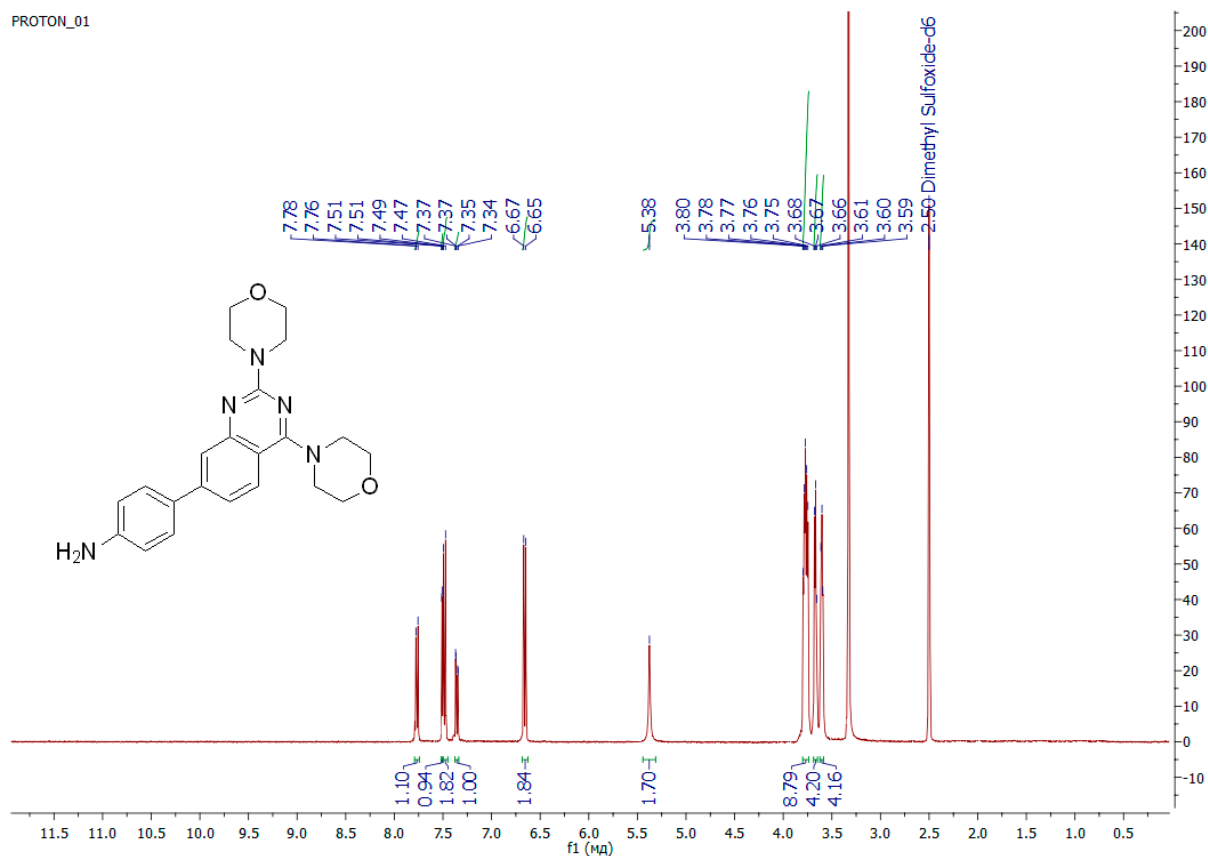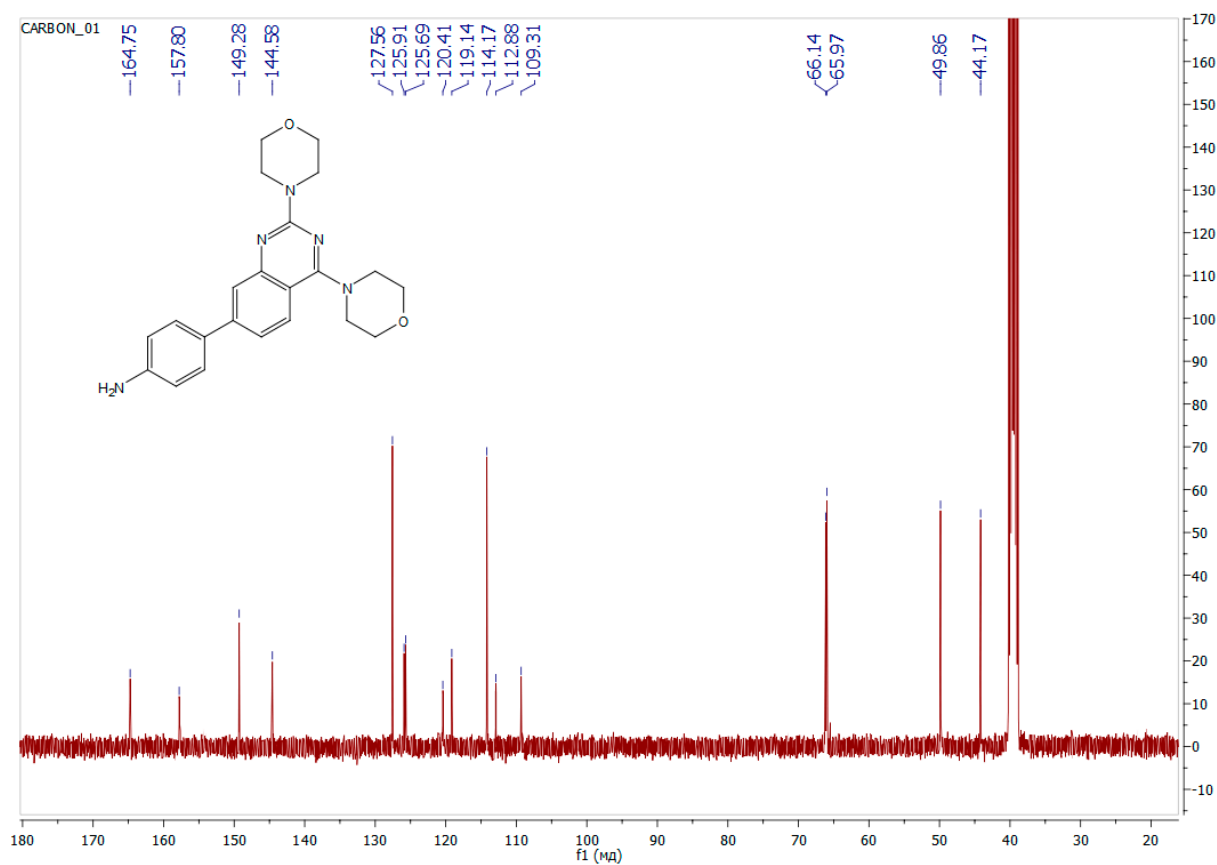



# 1-(4-(2,4-dimorpholinoquinazolin-7-yl)phenyl)-3-(furan-2-ylmethyl)urea **7a**

PROTON\_01

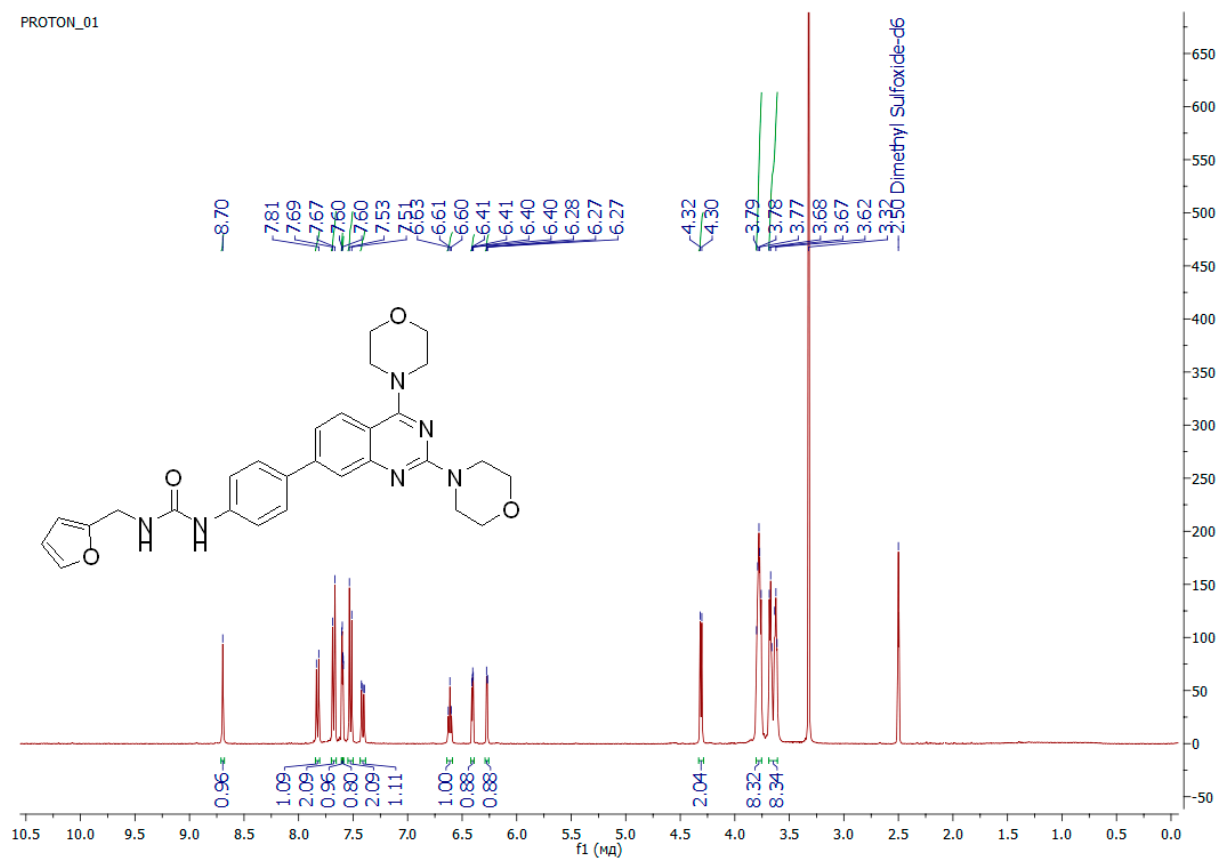

CARBON\_01

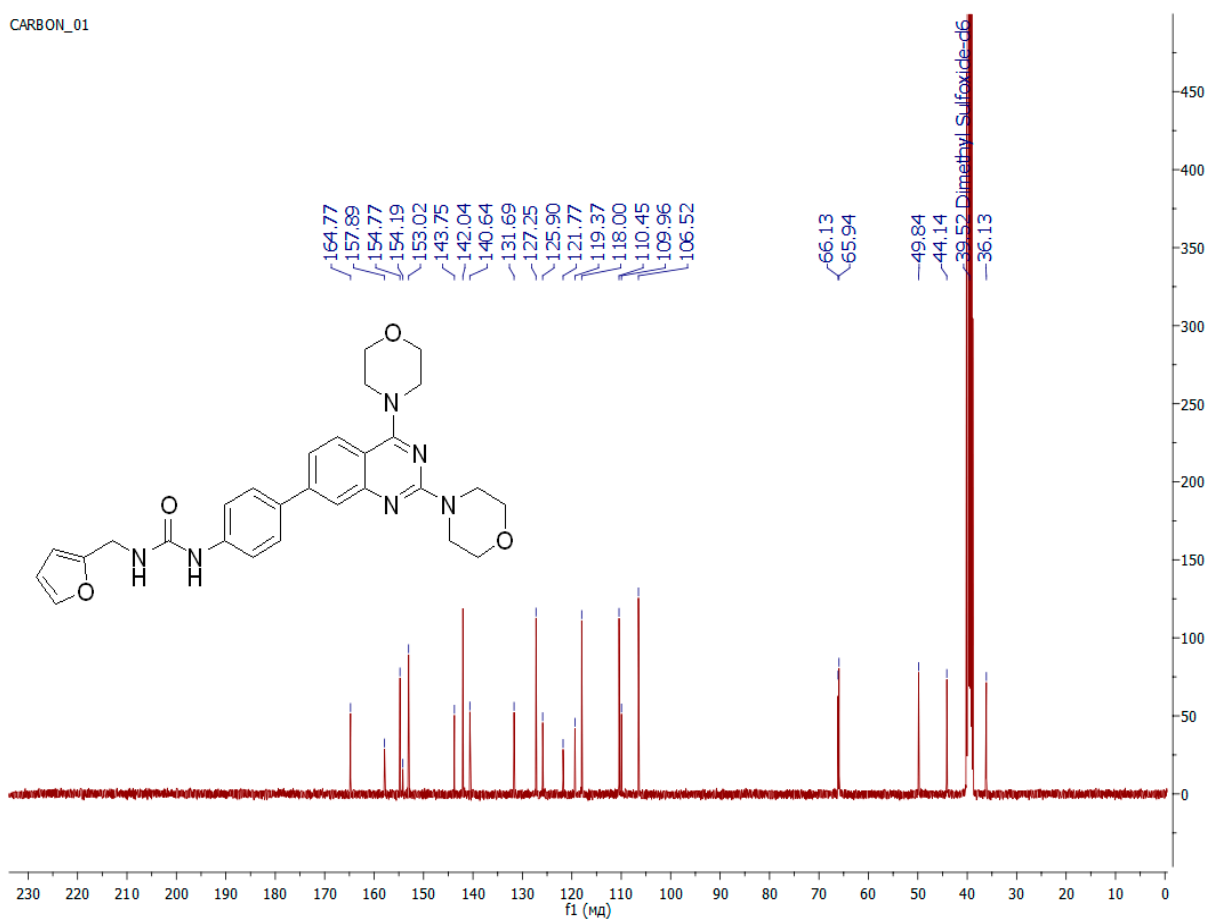

1-(4-(2,4-dimorpholinoquinazolin-7-yl)phenyl)-3-(4-methoxybenzyl)urea  
**7b**

PROTON\_01

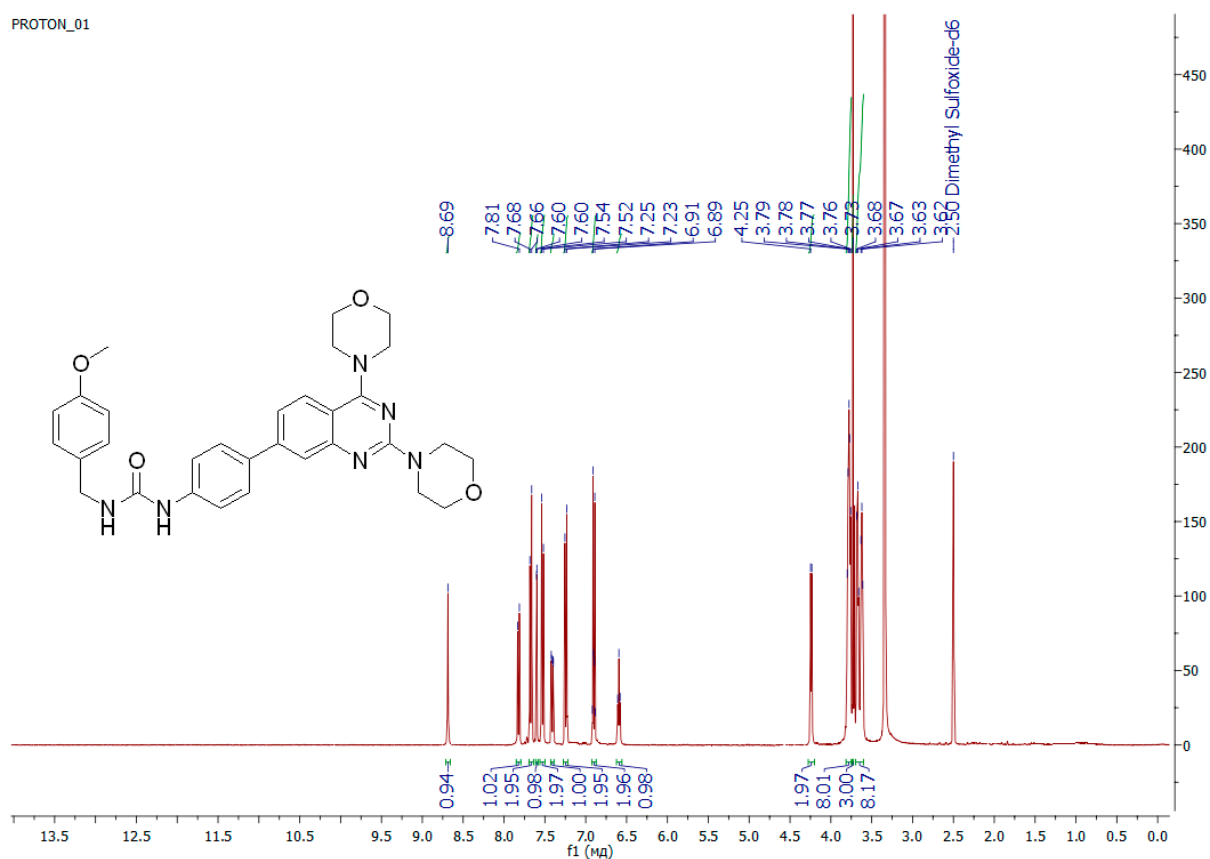

CARBON\_01

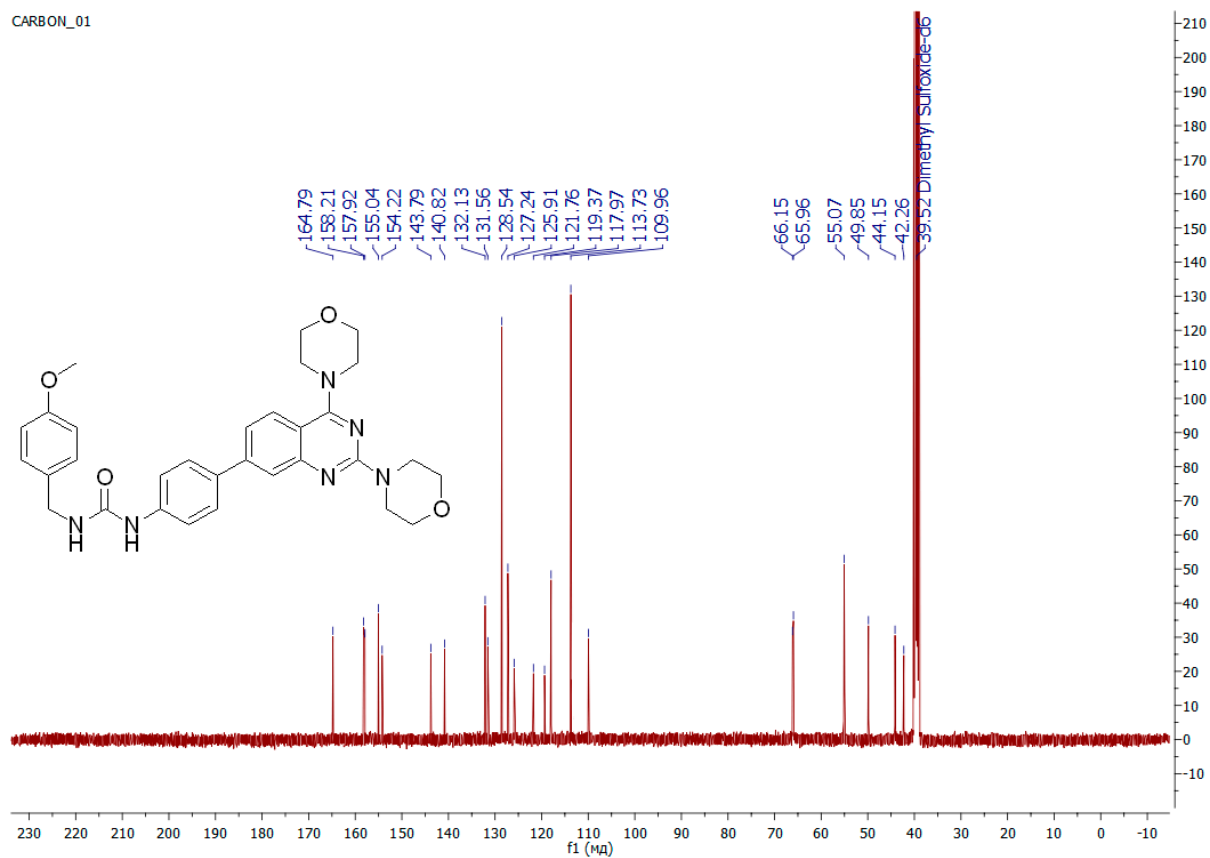

1-(4-(2,4-dimorpholinoquinazolin-7-yl)phenyl)-3-(2-(pyridin-3-yl)ethyl)urea **7c**

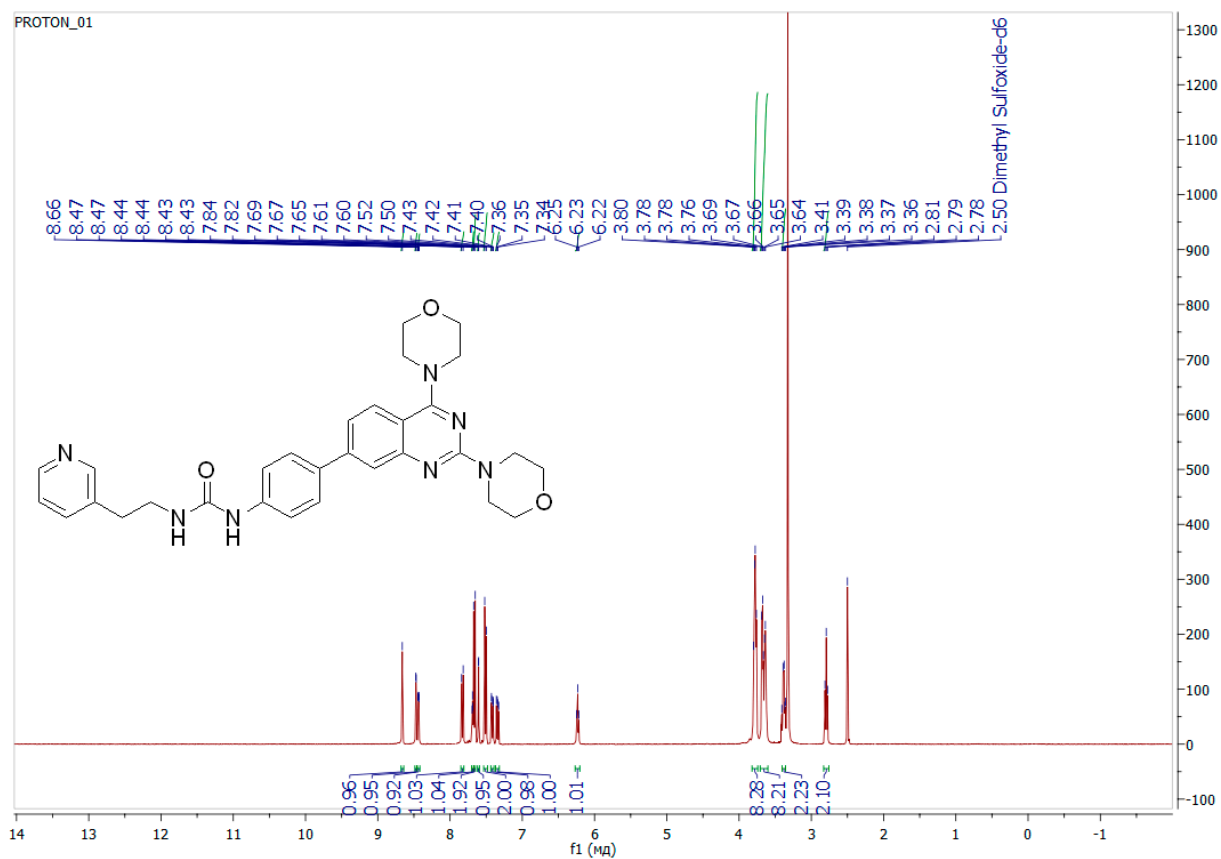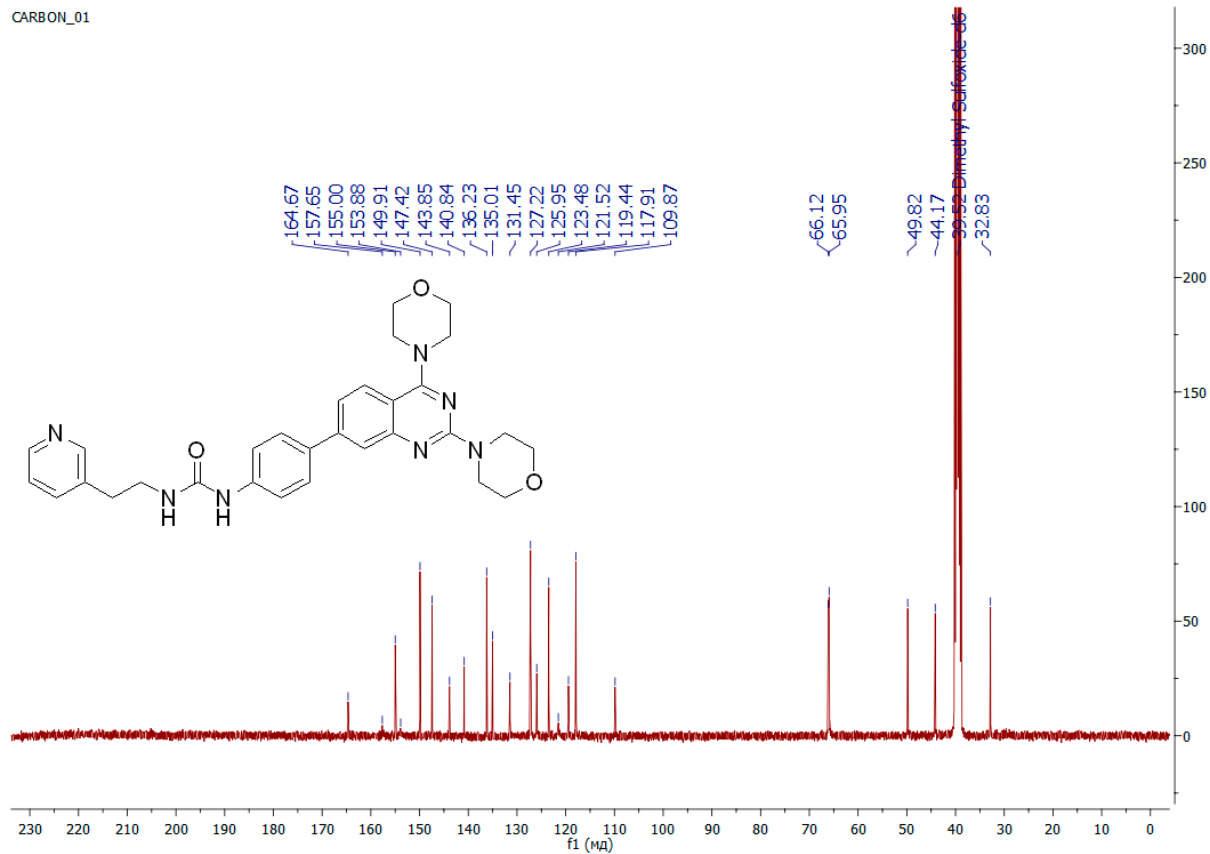

1-cyclopropyl-3-(4-(2,4-dimorpholinoquinazolin-7-yl)phenyl)urea

7d

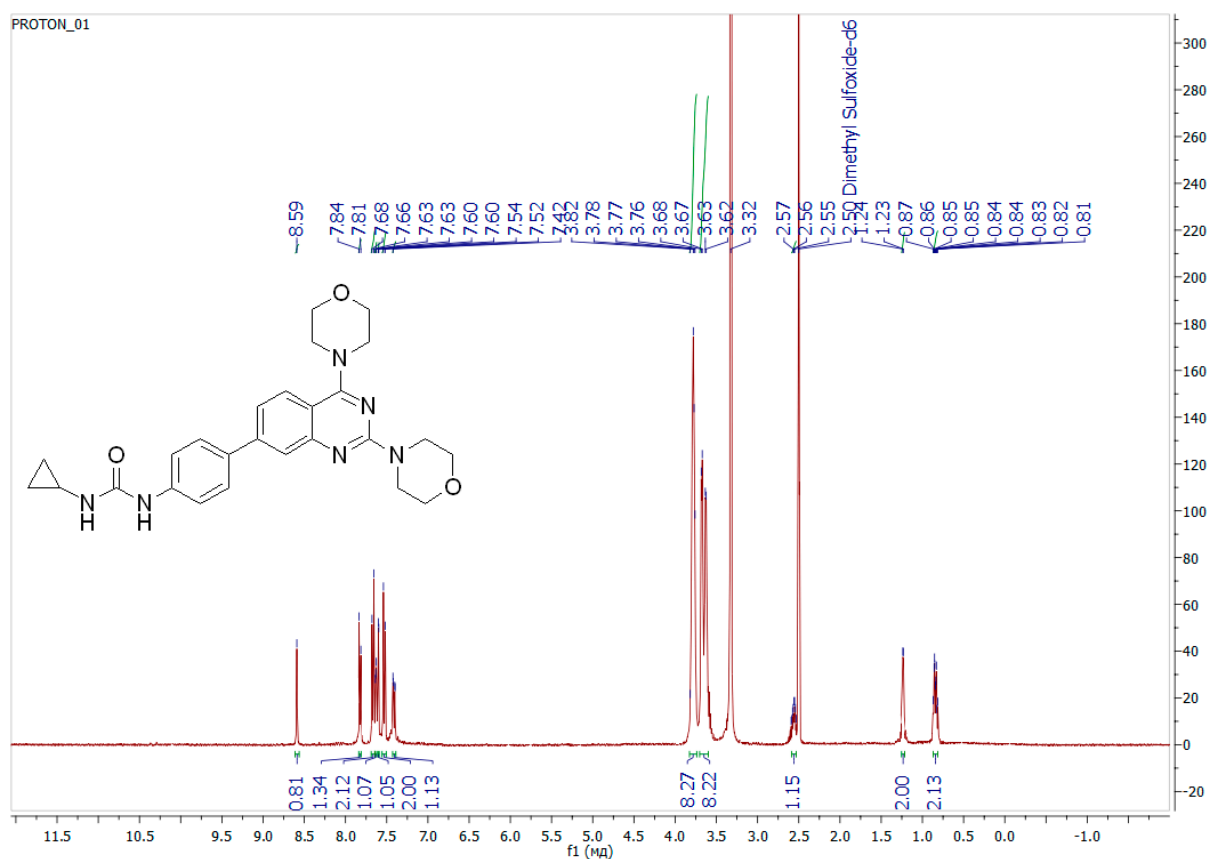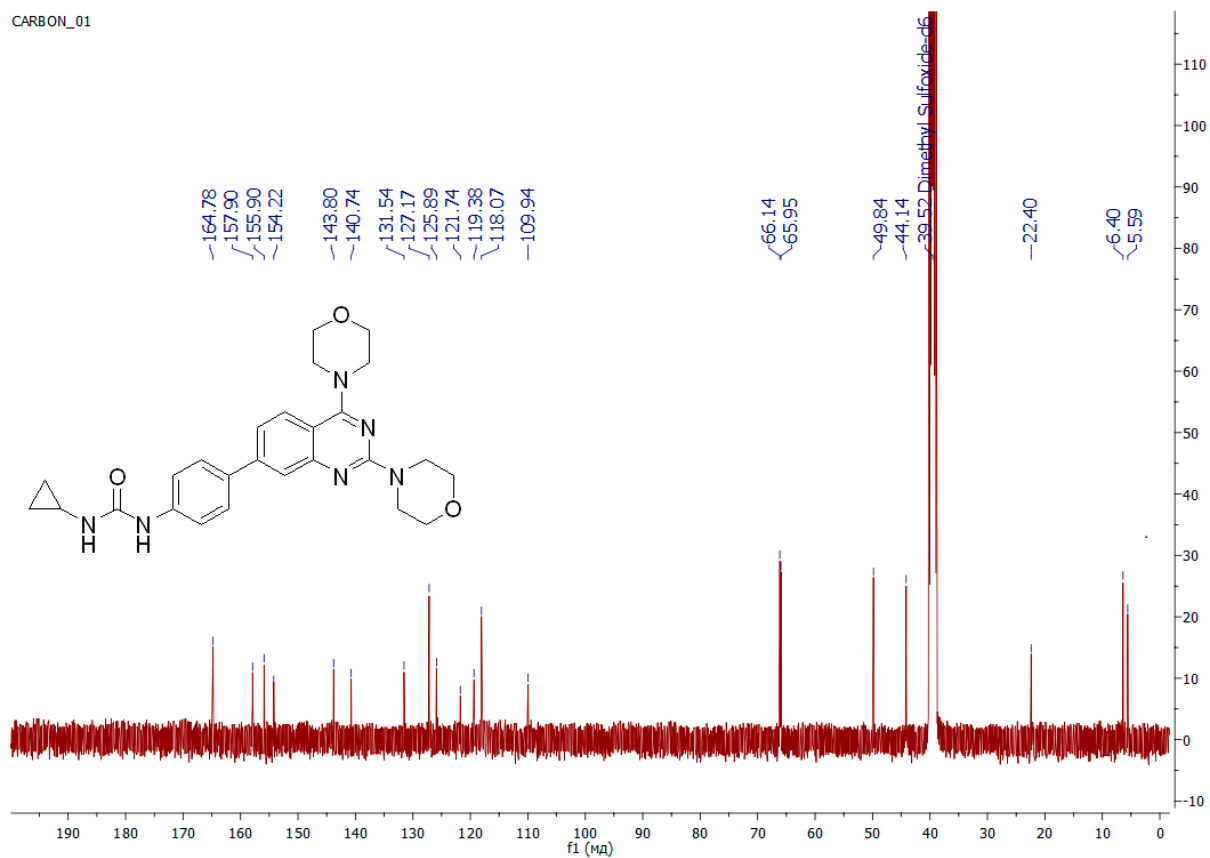

N6-((4-(2,4-dimorpholinoquinazolin-7-yl)phenyl)carbamoyl)lysine

7e

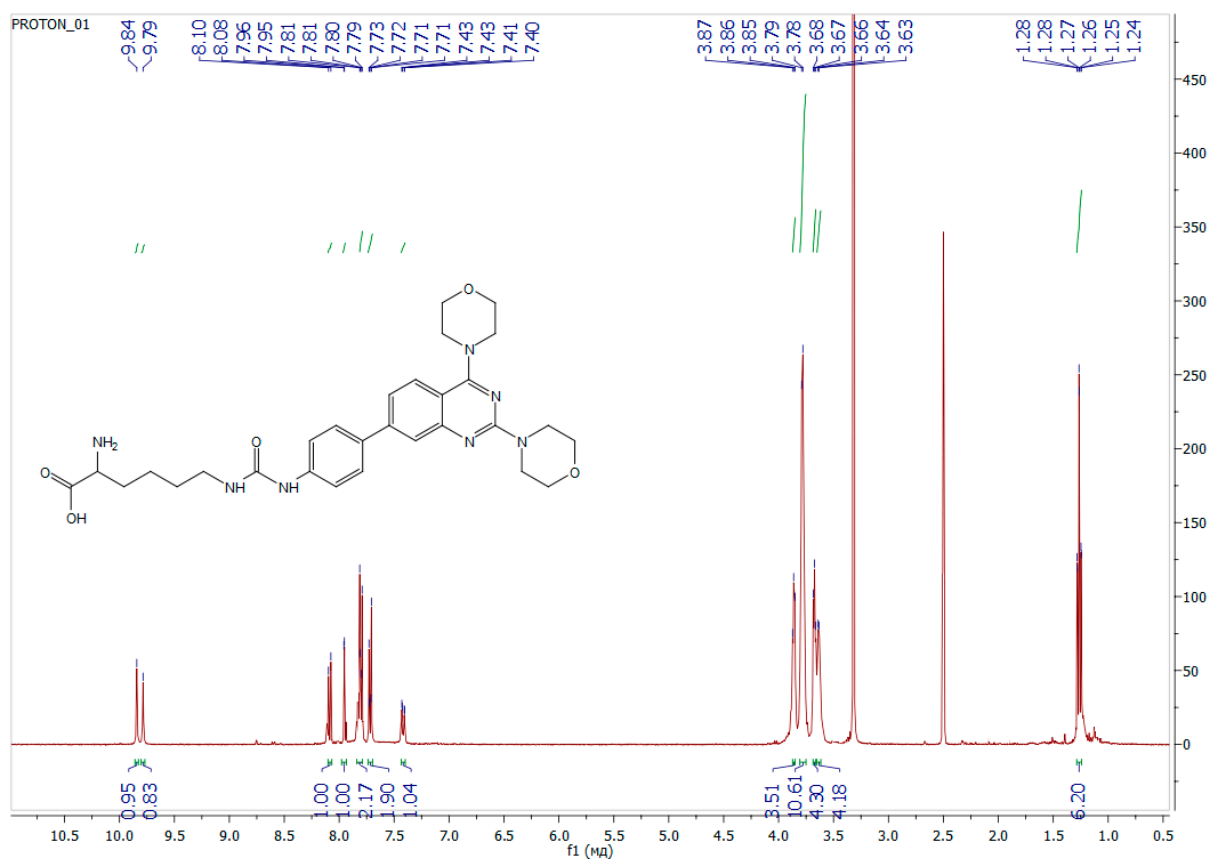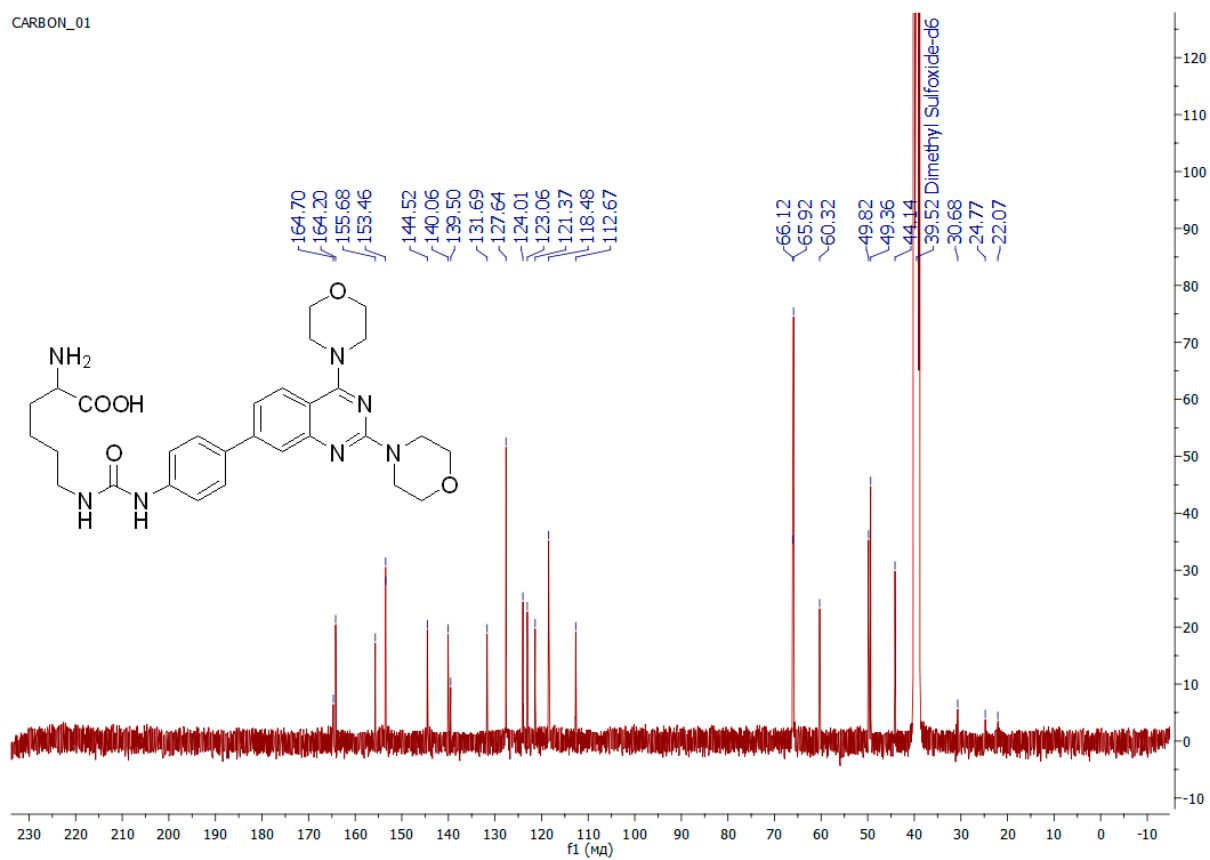

1-(4-(2,4-dimorpholinoquinazolin-7-yl)phenyl)-3-(4-nitrophenyl)urea  
**7f**

PROTON\_01

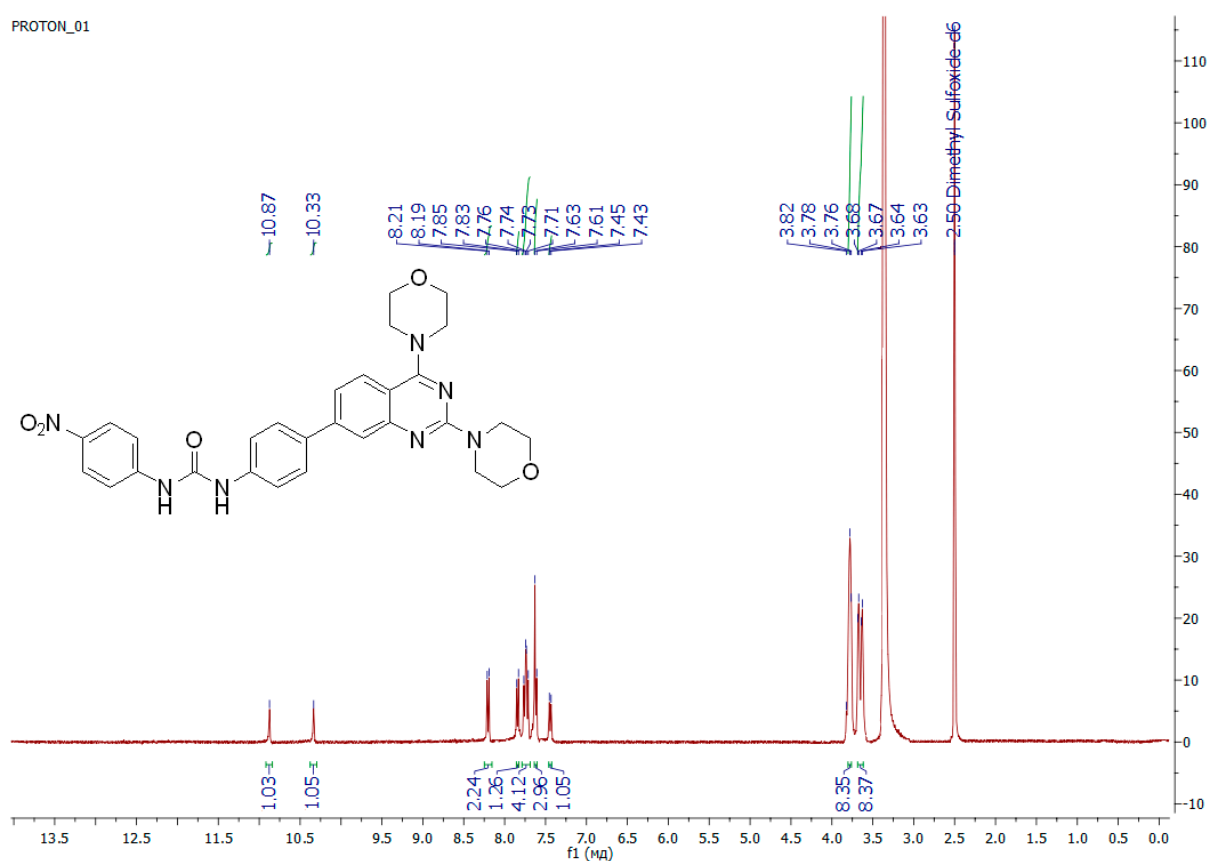

CARBON\_01

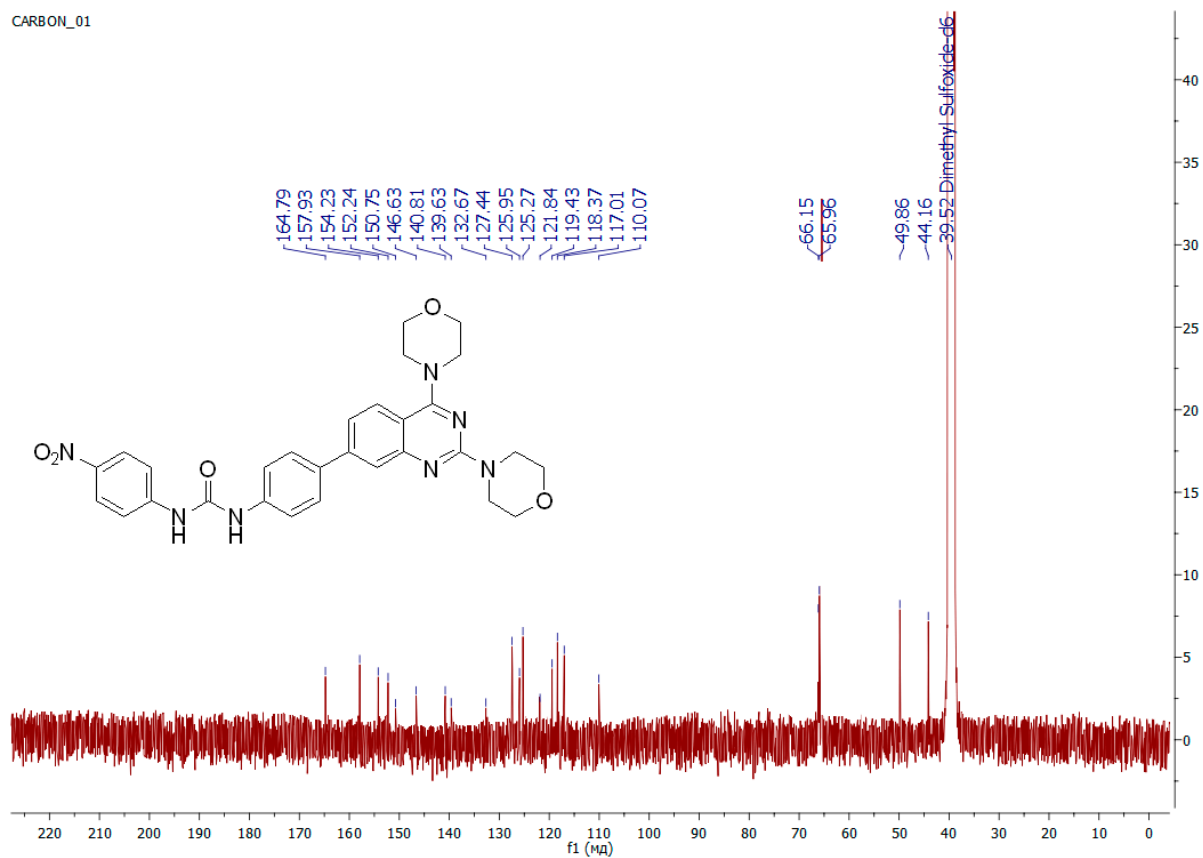

1-(4-(2,4-dimorpholinoquinazolin-7-yl)phenyl)-3-(4-fluorophenyl)urea

7g

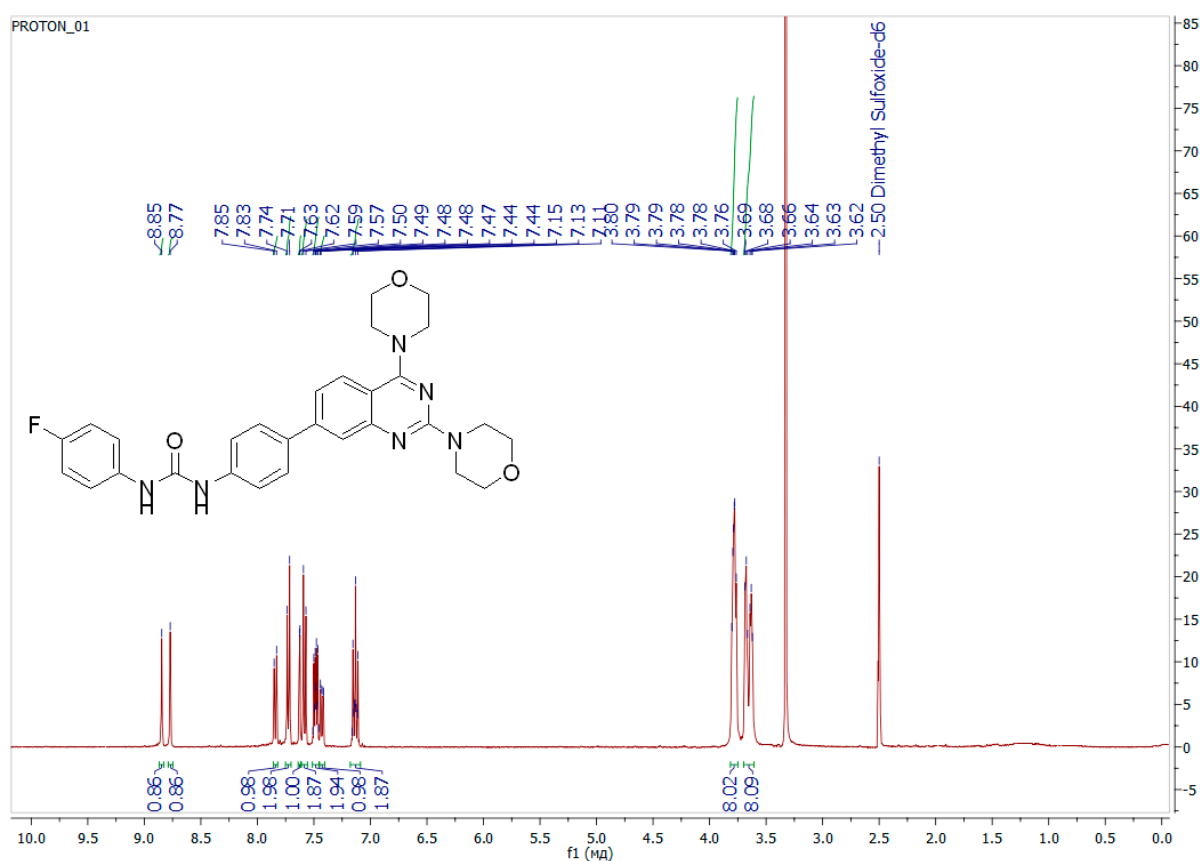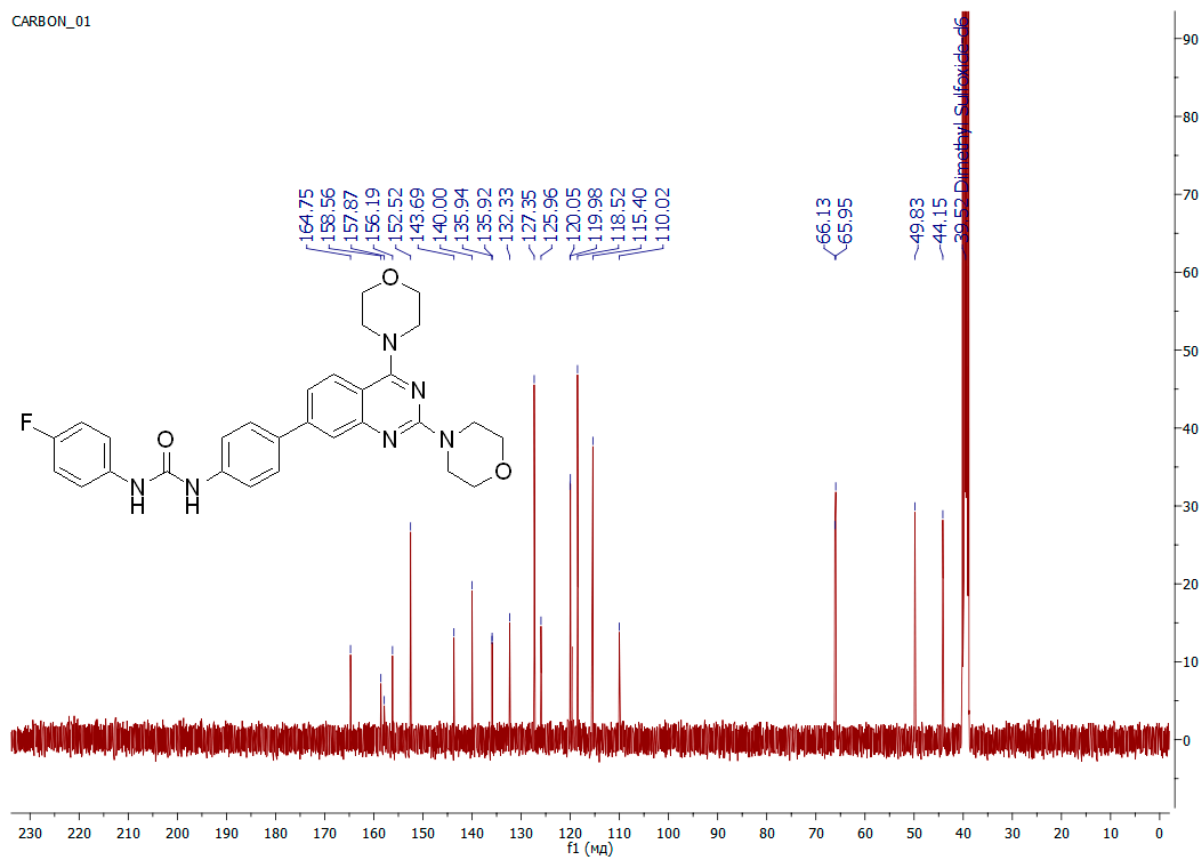

FLUORINE\_01

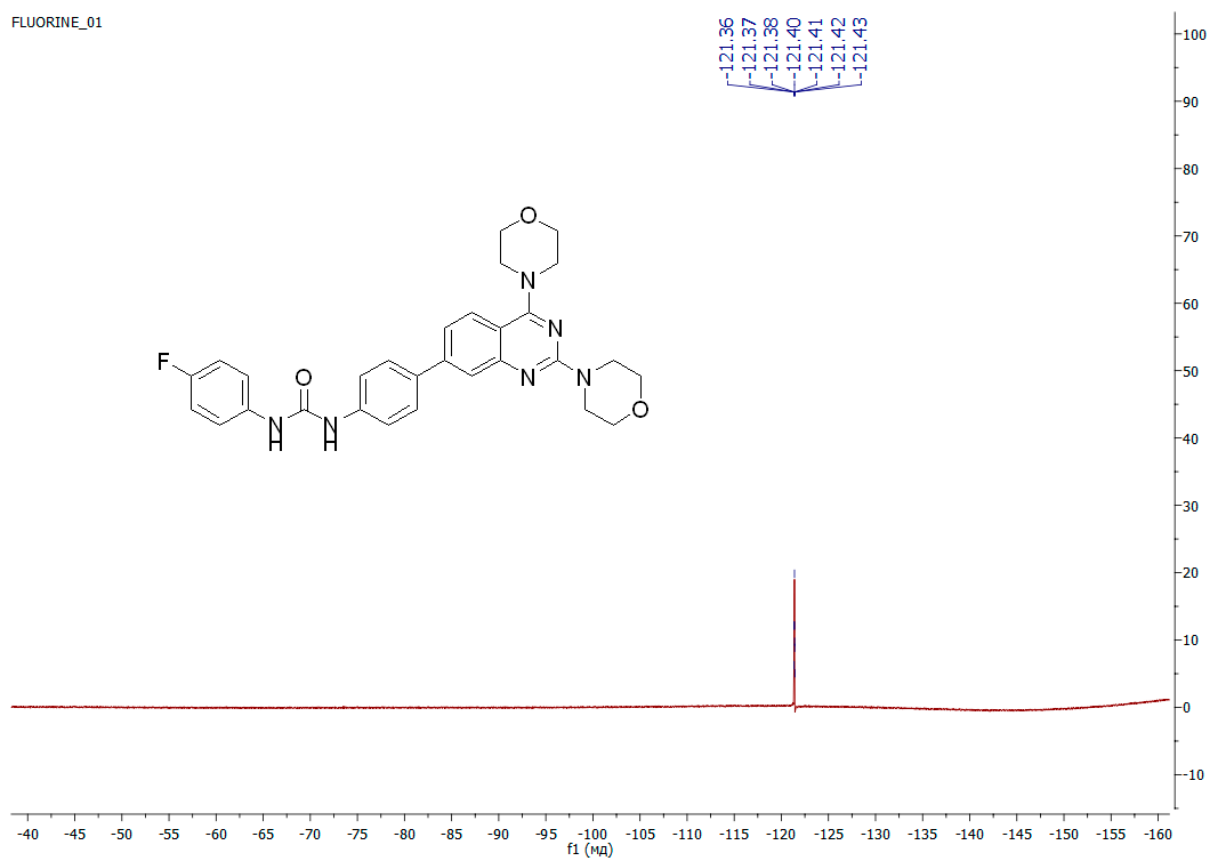



1-(4-(2,4-dimorpholinoquinazolin-7-yl)phenyl)-3-(pyridin-2-yl)urea

7h

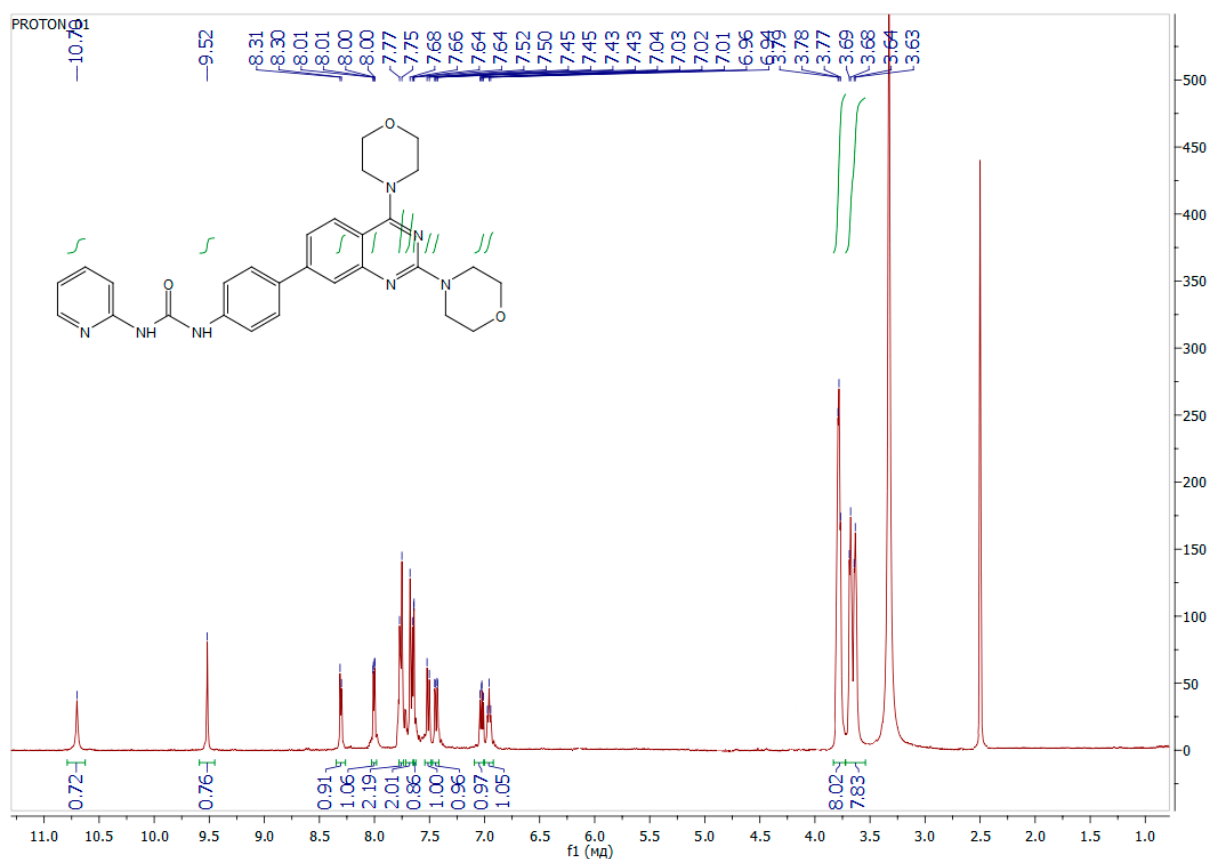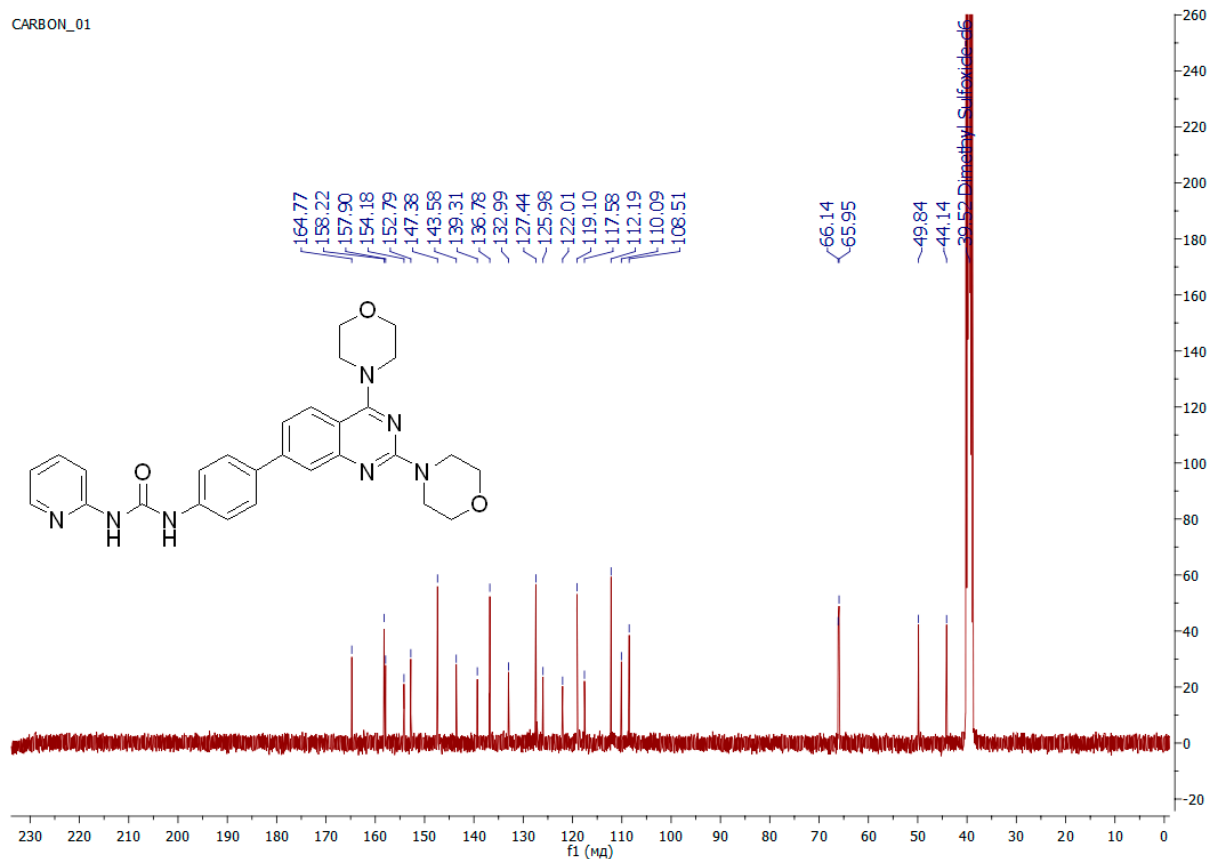

1-(4-(2,4-dimorpholinoquinazolin-7-yl)phenyl)-3-(naphthalen-1-yl)urea

7i

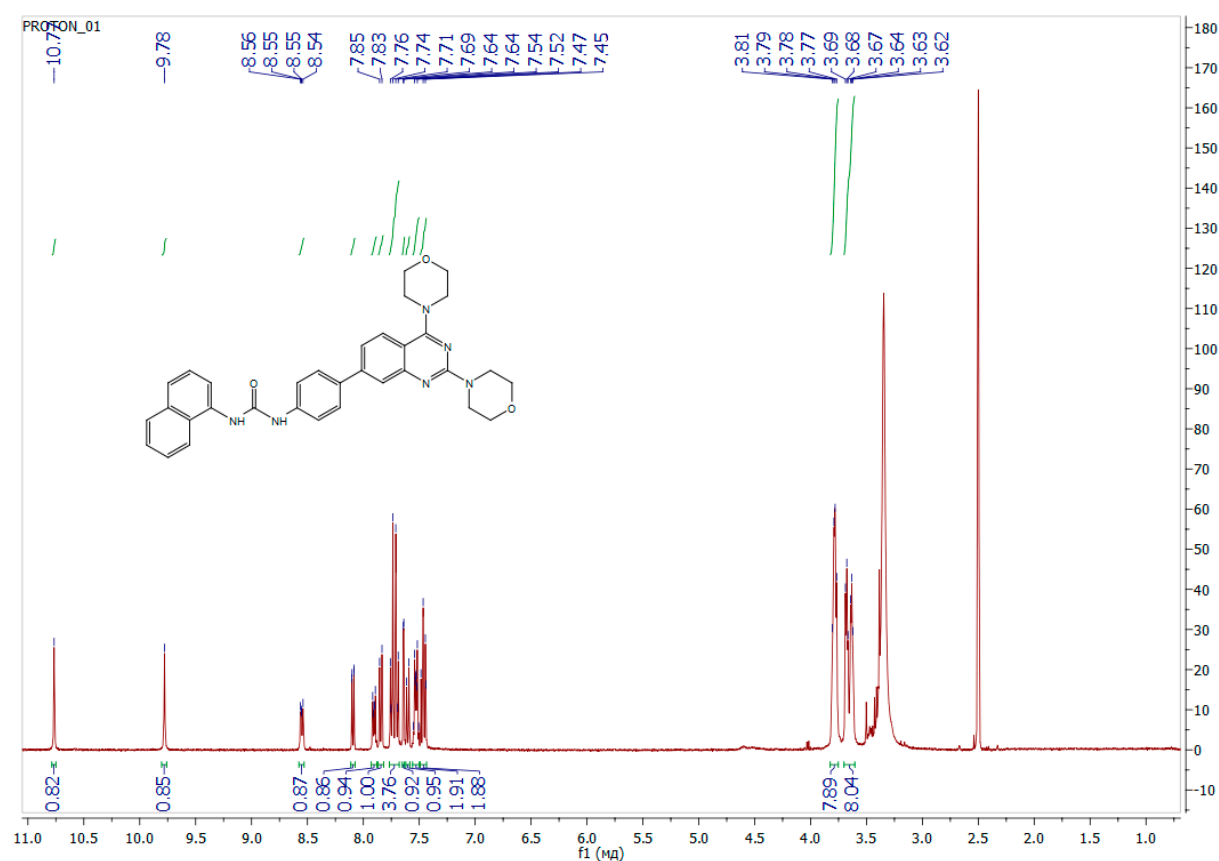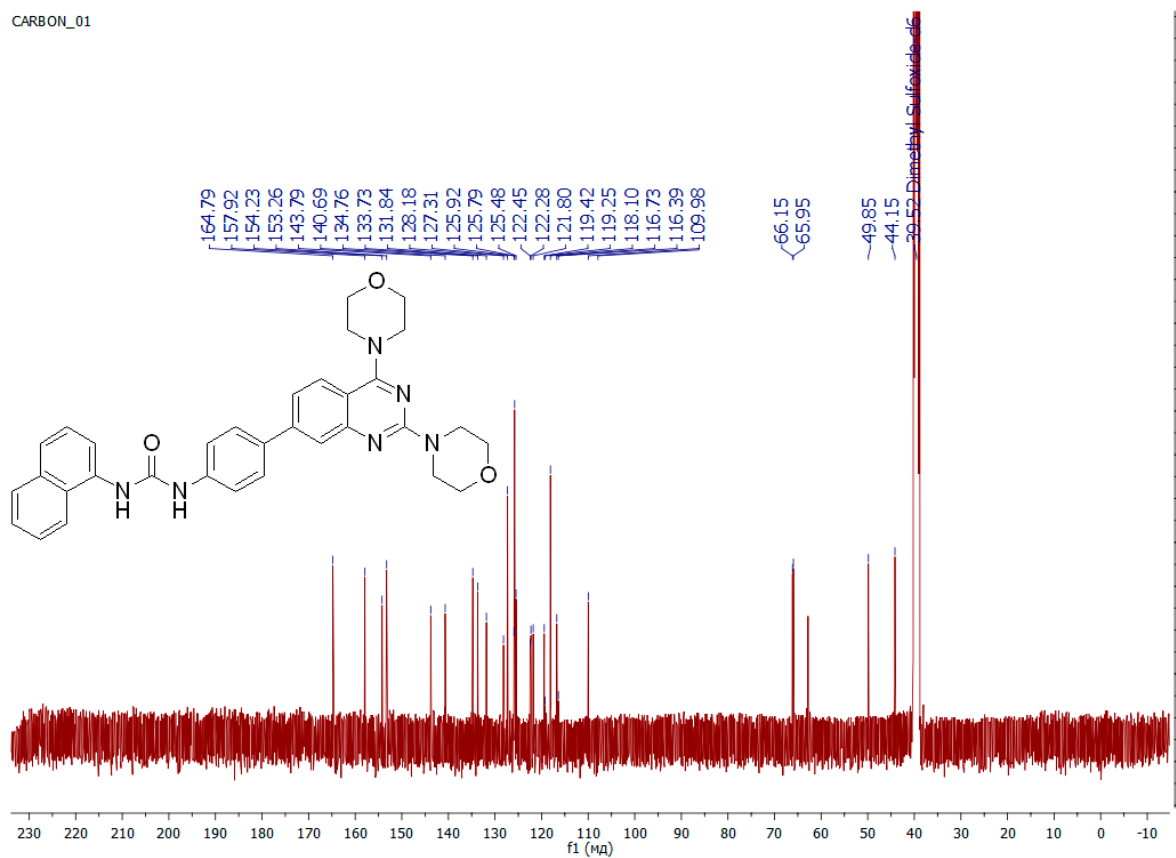

# Methyl 4-(3-(4-(2,4-dimorpholinoquinazolin-7-yl)phenyl)ureido)benzoate

7j

PROTON\_01

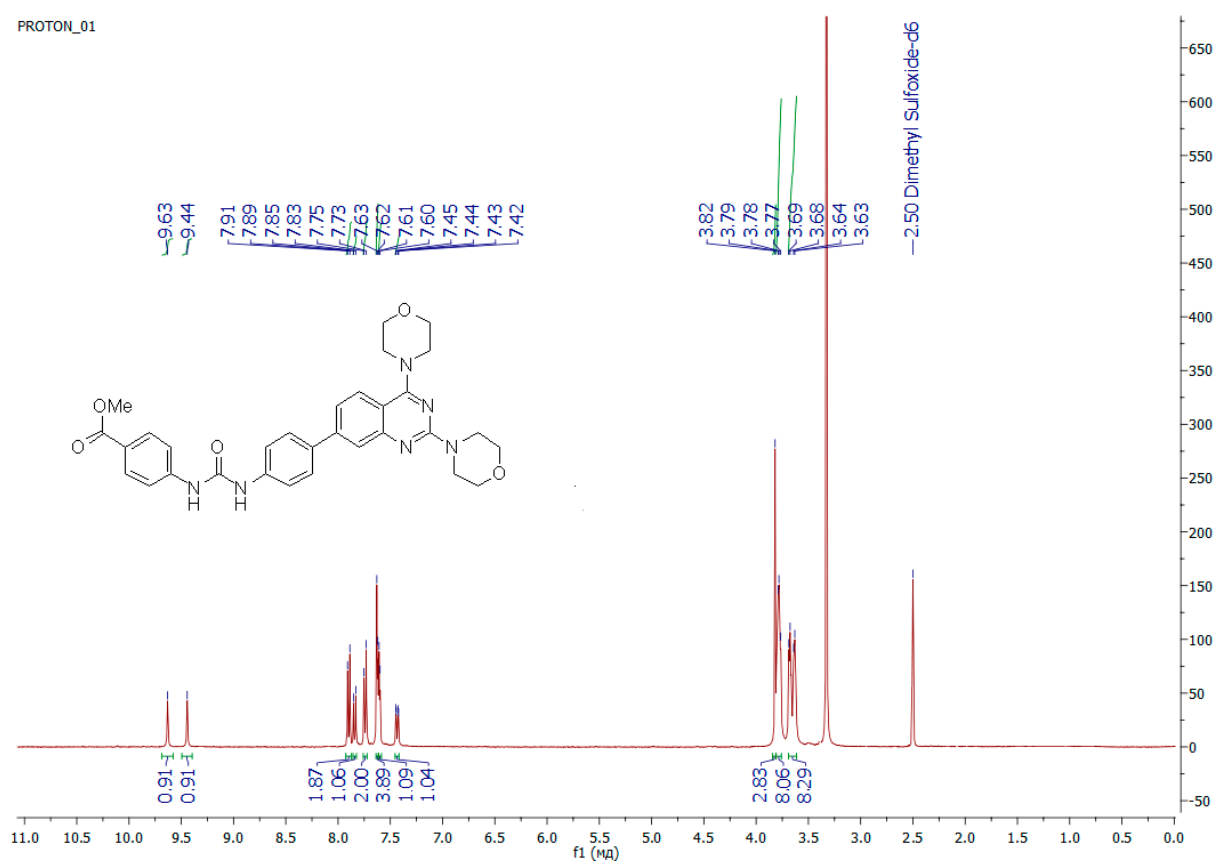

CARBON\_01

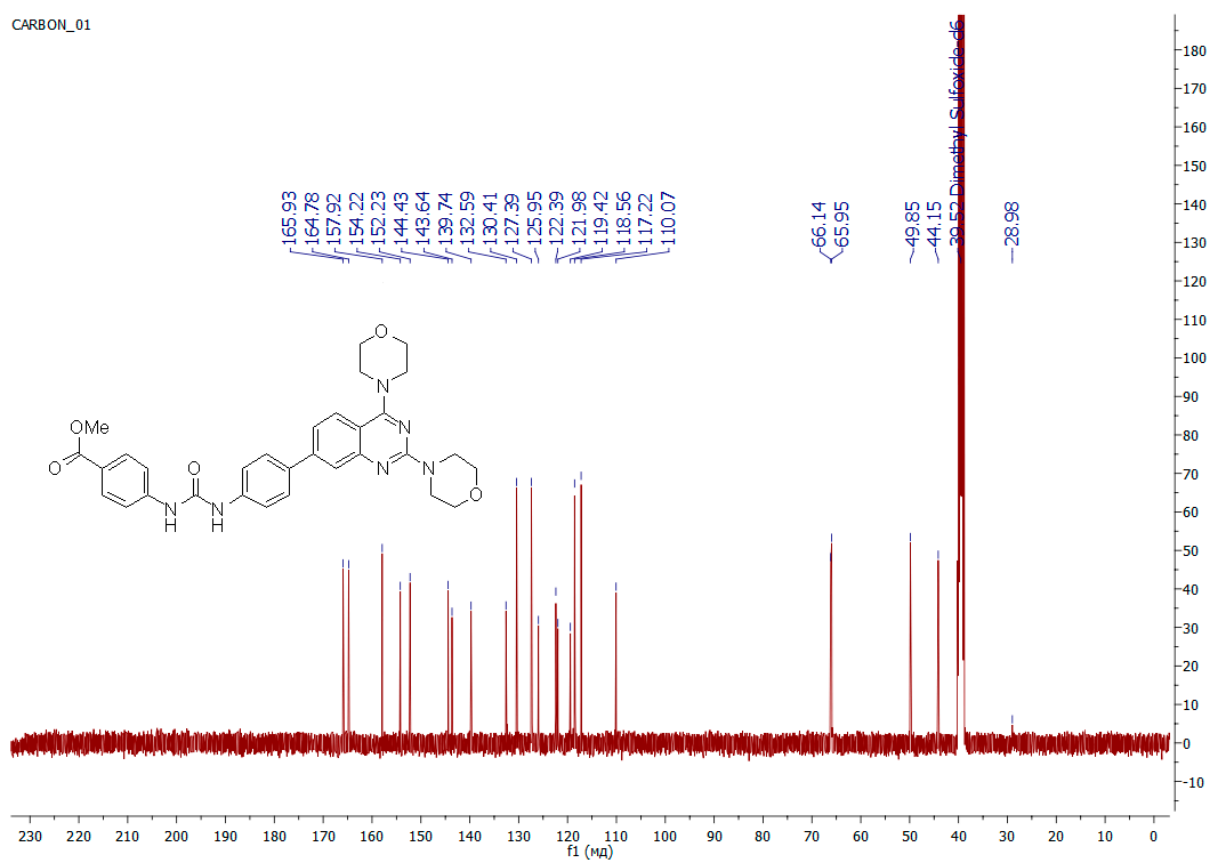

# Ethyl 4-((4-(2,4-dimorpholinoquinazolin-7-yl)phenyl)carbamoyl)piperazine-1-carboxylate **7k**

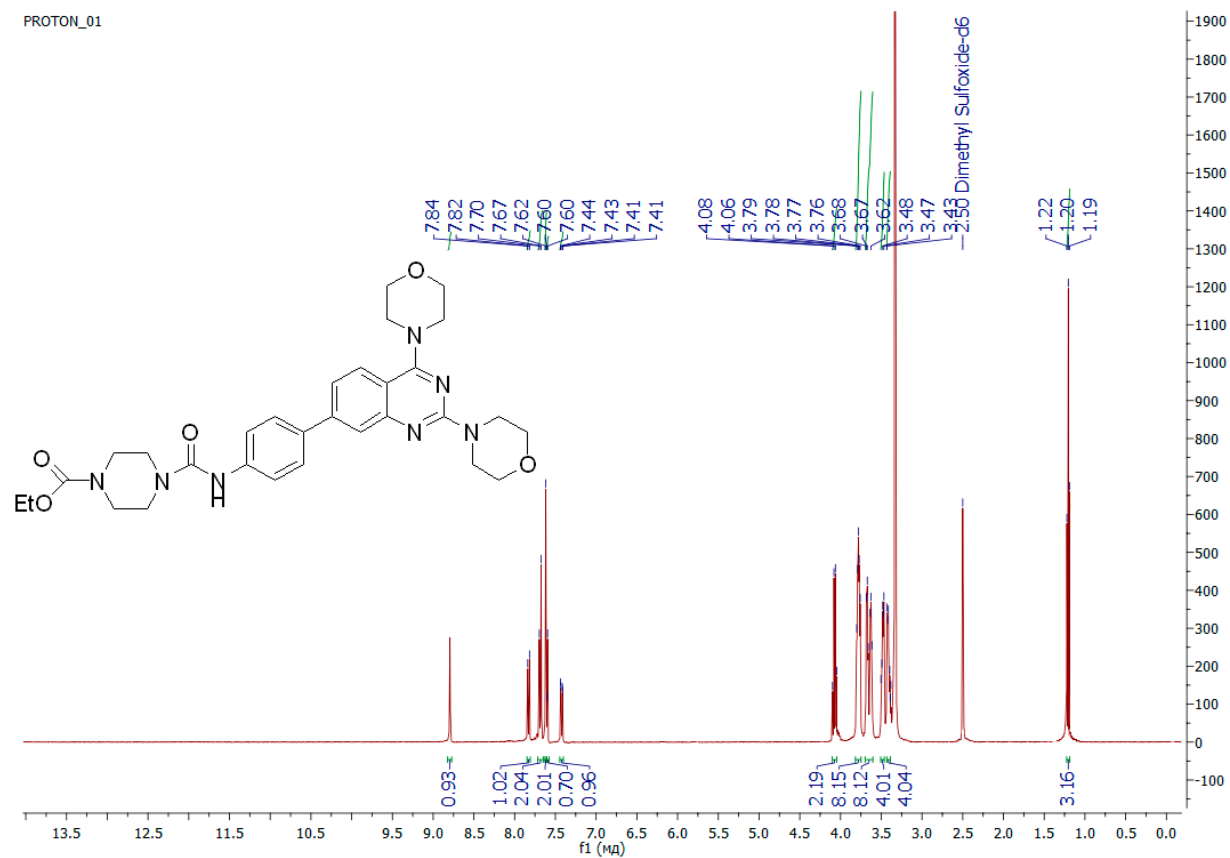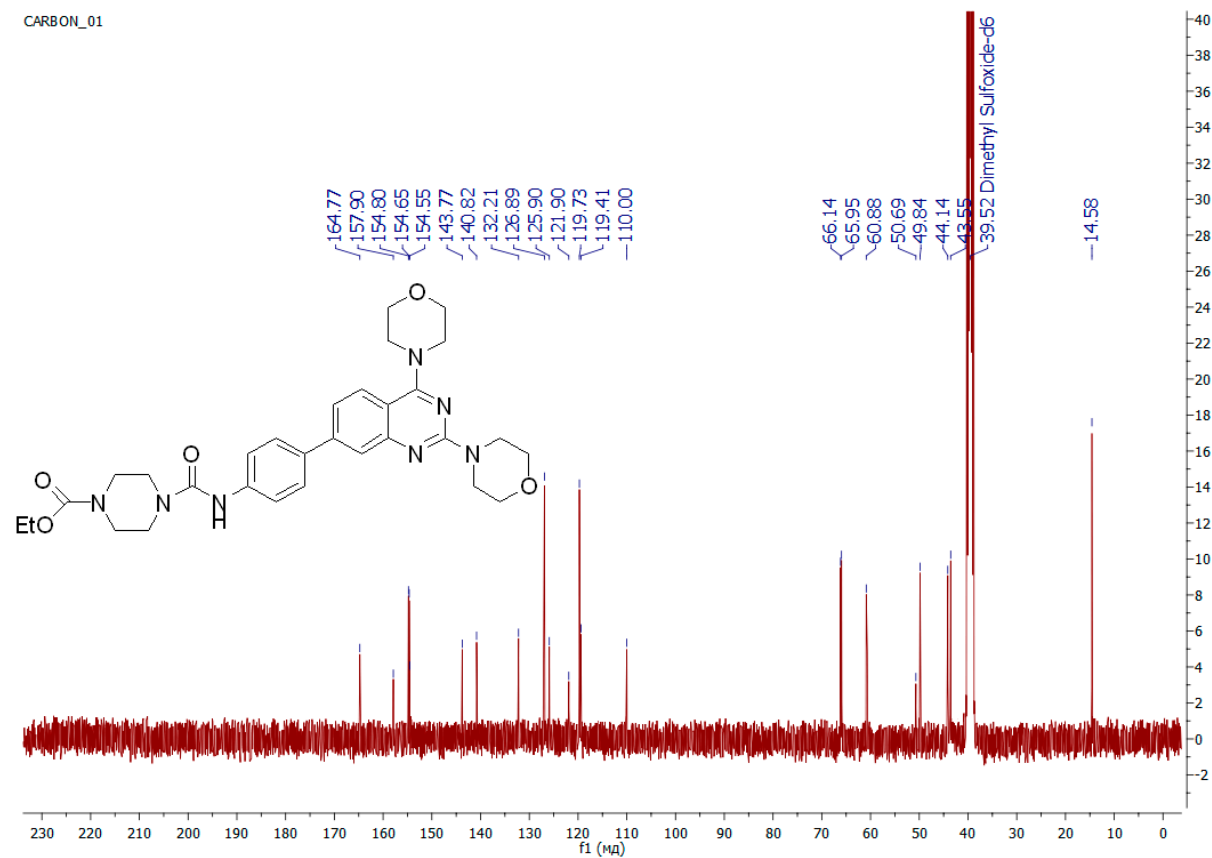

1-(4-(2,4-dimorpholinoquinazolin-7-yl)phenyl)-3-(prop-2-yn-1-yl)urea

7l

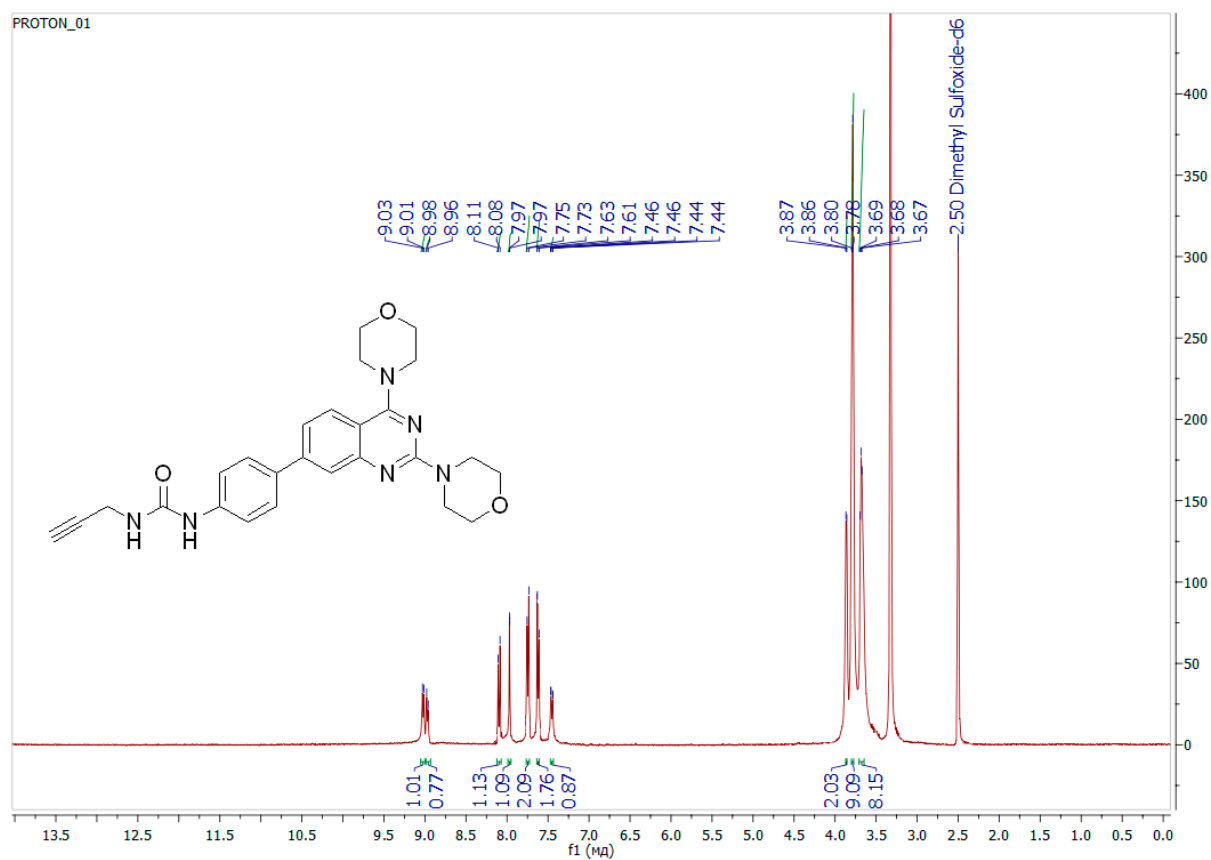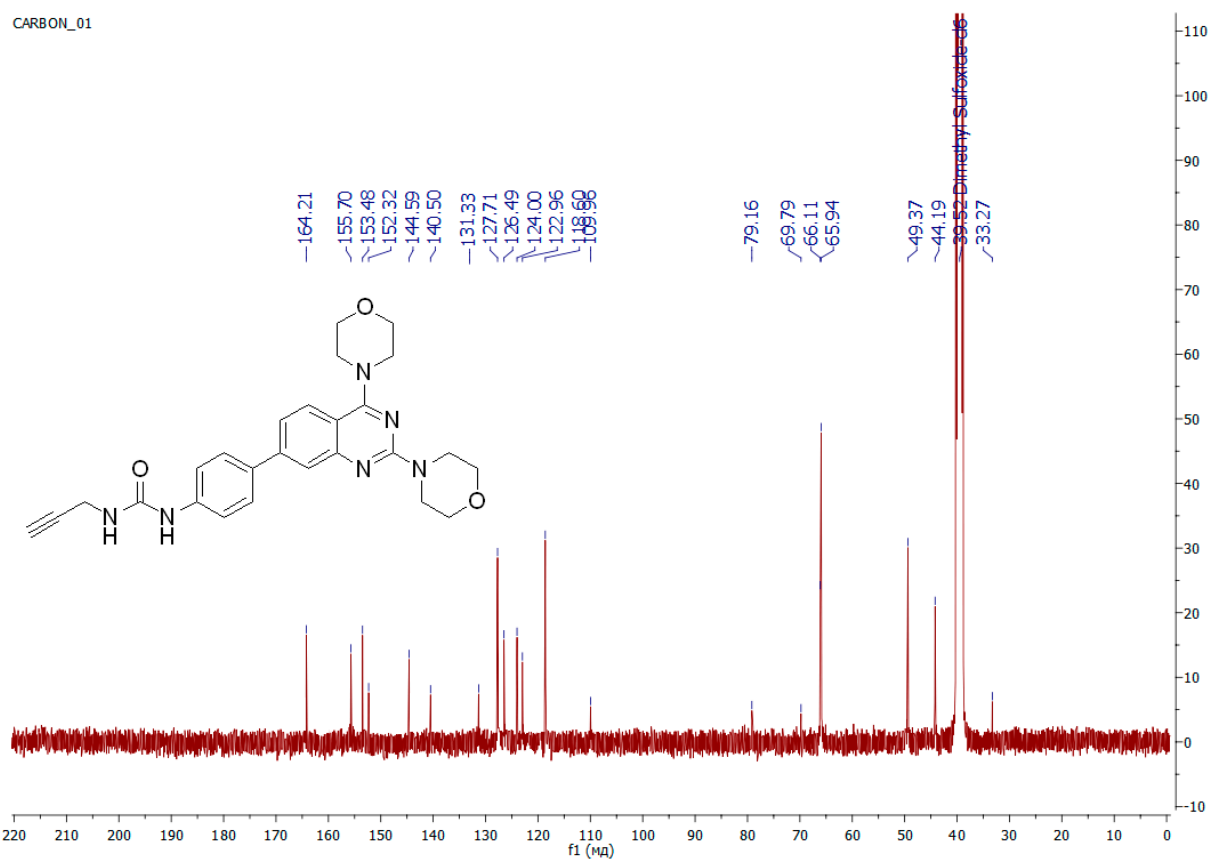

Table S1

Predicted ADME features of target compounds

| Compound | c Log P | Solubility in water (ESOL)  | Log Kp (skin permeation) | Number of H-bond donors | Number of H-bond acceptors |
|----------|---------|-----------------------------|--------------------------|-------------------------|----------------------------|
| 7a       | 2.90    | $9.00 \times 10^{-3}$ mg/ml | -7.36 cm/s               | 2                       | 6                          |
| 7b       | 3.53    | $1.85 \times 10^{-3}$ mg/ml | 6.99 cm/s                | 2                       | 6                          |
| 7c       | 3.08    | $5.07 \times 10^{-3}$ mg/ml | -7.31 cm/s               | 2                       | 6                          |
| 7d       | 2.74    | $1.57 \times 10^{-2}$ mg/ml | 7.14 cm/s                | 2                       | 5                          |
| 7e       | 1.22    | 1.08 mg/ml                  | -9.87 cm/s               | 4                       | 8                          |
| 7f       | 2.81    | $1.77 \times 10^{-3}$ mg/ml | -7.05 cm/s               | 2                       | 7                          |
| 7g       | 3.84    | $1.35 \times 10^{-3}$ mg/ml | -6.68 cm/s               | 2                       | 6                          |
| 7h       | 2.94    | $5.49 \times 10^{-3}$ mg/ml | -7.18 cm/s               | 2                       | 6                          |
| 7i       | 4.45    | $1.58 \times 10^{-4}$ mg/ml | -6.07 cm/s               | 2                       | 5                          |
| 7j       | 3.54    | $1.71 \times 10^{-3}$ mg/ml | -7.11 cm/s               | 2                       | 7                          |
| 7k       | 2.48    | $1.12 \times 10^{-2}$ mg/ml | -7.99 cm/s               | 1                       | 7                          |
| 7l       | 2.61    | $3.05 \times 10^{-2}$ mg/ml | -7.44 cm/s               | 2                       | 5                          |

Docking of reference (line 1) and synthesized compounds (lines 2-5) in active site of PI3K $\alpha$  and PI3K $\gamma$  isoforms. Structures of compounds are represented below.

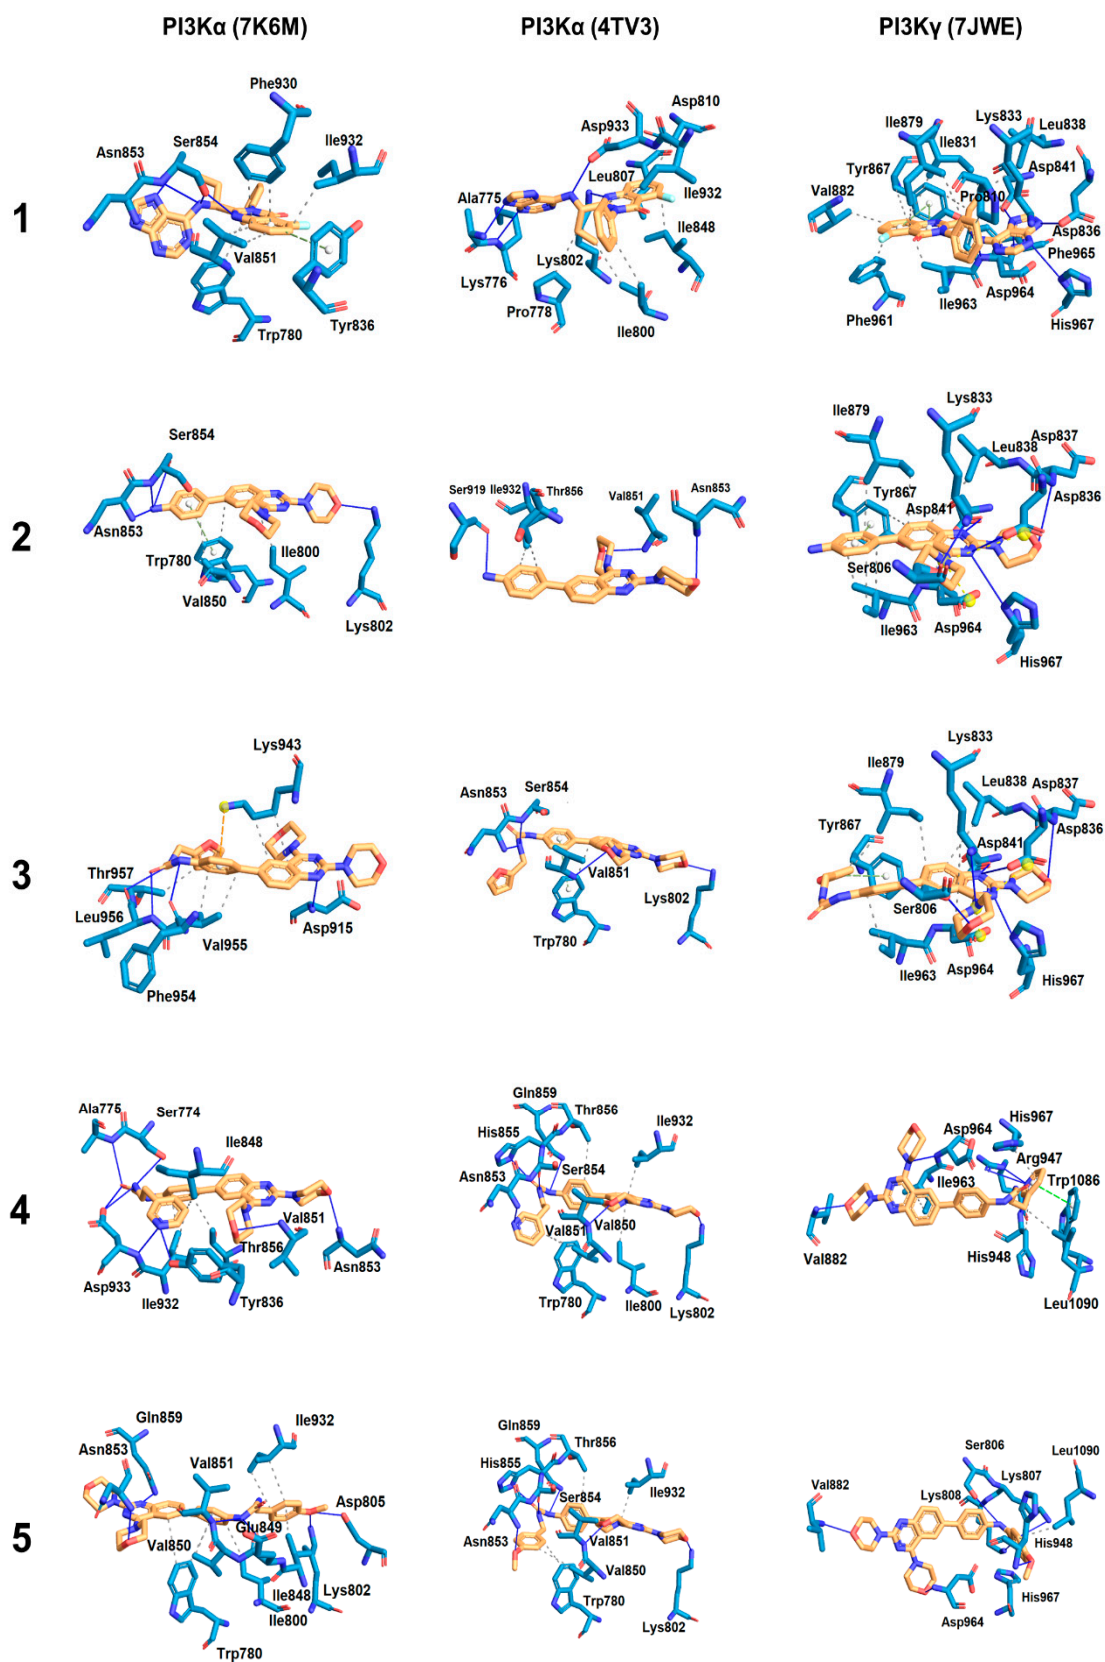

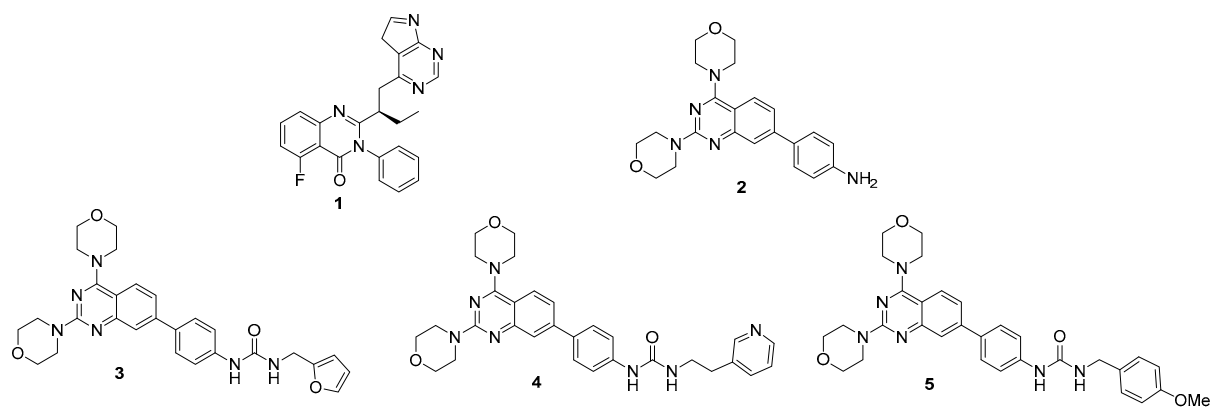



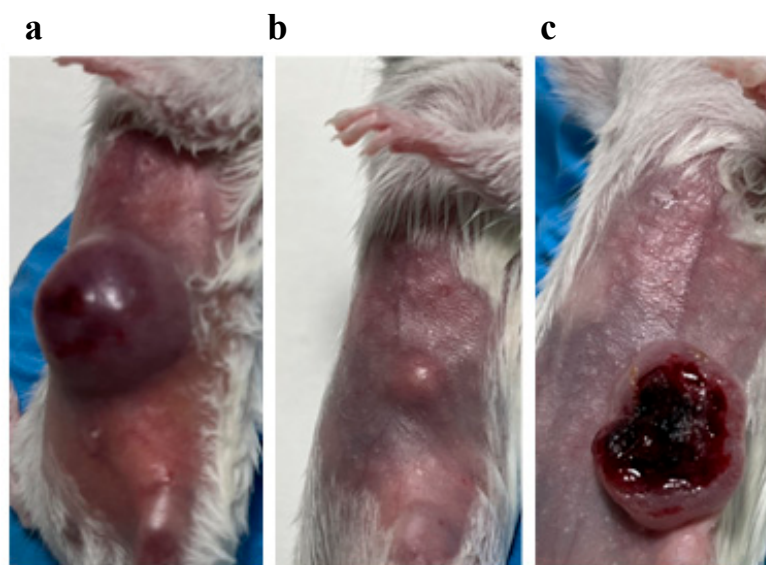

Figure S1. **Effect of the compound 7c on tumor growth.** BALB/c mice were s.c. inoculated with colorectal Colon-26 cells. a-c: Overview of the tumors in control (a), at early (b) and late (c) treatment at day 28 post tumor transplantation.

## Area % Report

Data File: C:\EZChrom Elite\Enterprise\Projects\Default\Data\hplc.10001 20.06.2022 18-36-54.dat  
 Method: C:\EZChrom Elite\Enterprise\Projects\Default\Method\esk.met  
 Acquired: 20.06.2022 18:37:54  
 Printed: 21.06.2022 12:36:14

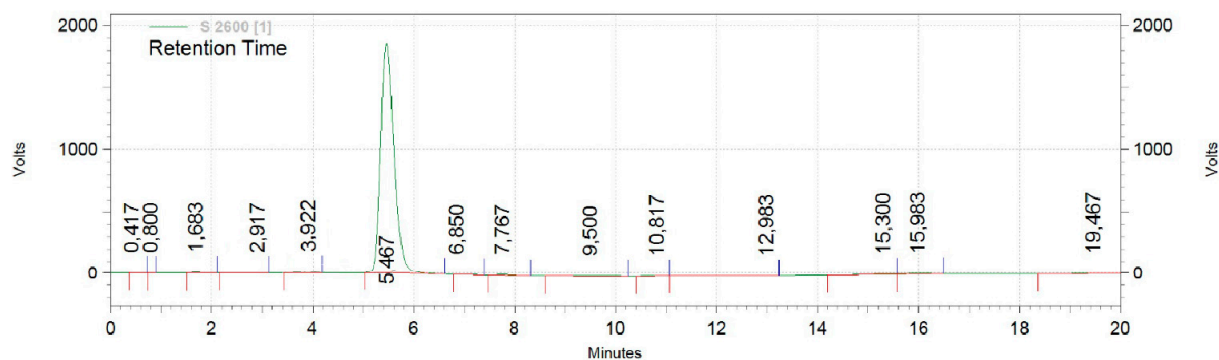

| Retention time | Area              | Area, %    | Height         | Height, %  |
|----------------|-------------------|------------|----------------|------------|
| 0,417          | 916               | 0,00       | 46             | 0,00       |
| 0,800          | 1150              | 0,00       | 233            | 0,00       |
| 1,683          | 90433             | 0,18       | 8121           | 0,38       |
| 2,917          | 11892             | 0,03       | 414            | 0,01       |
| 3,922          | 539435            | 1,52       | 9047           | 0,73       |
| 5,467          | 33970229          | 95,89      | 1852504        | 97,45      |
| 6,850          | 33576             | 0,10       | 762            | 0,03       |
| 7,767          | 128543            | 0,34       | 6251           | 0,31       |
| 9,500          | 152964            | 0,42       | 3672           | 0,18       |
| 10,817         | 27283             | 0,08       | 1260           | 0,05       |
| 12,983         | 51771             | 0,15       | 724            | 0,03       |
| 15,300         | 164994            | 0,47       | 6506           | 0,31       |
| 15,983         | 211220            | 0,57       | 7880           | 0,35       |
| 19,467         | 88348             | 0,25       | 2518           | 0,12       |
| <b>Total</b>   | <b>35 420 983</b> | <b>100</b> | <b>1899938</b> | <b>100</b> |
